# Supplementary material
Source: PubMed Central journal article supplement (PMC3075747)
Supplement: pp.110.167114_1.pdf [file pp.110.167114_1.pdf]

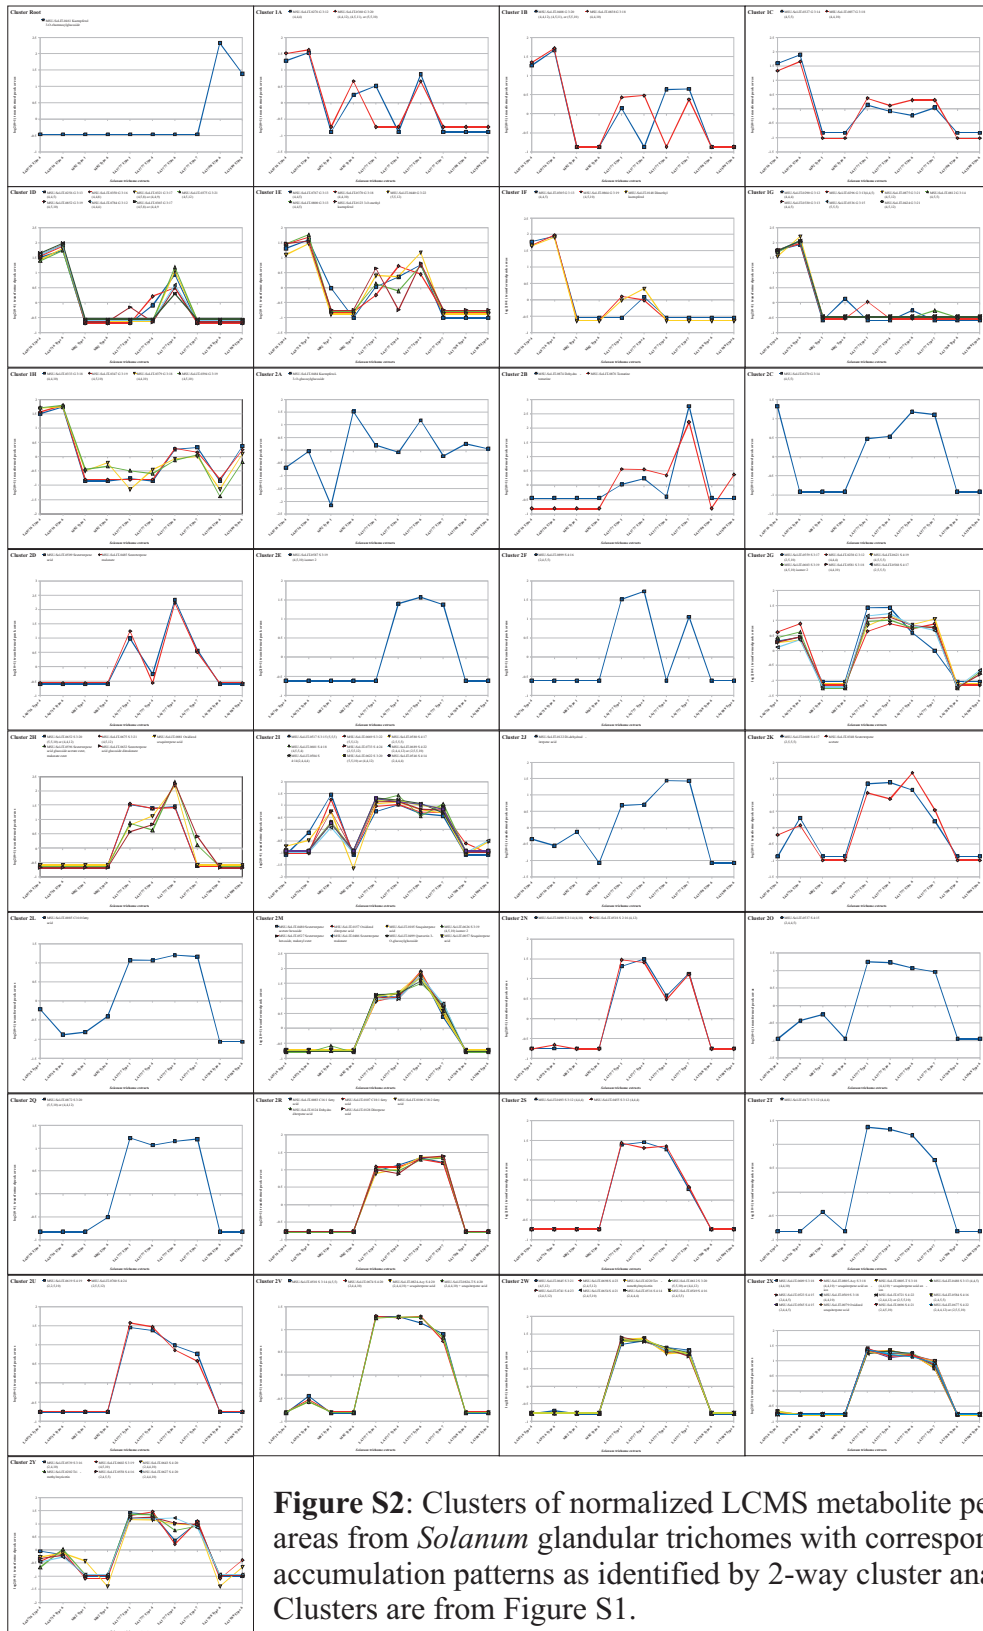

**Figure S2:** Clusters of normalized LCMS metabolite peak areas from *Solanum* glandular trichomes with corresponding accumulation patterns as identified by 2-way cluster analysis. Clusters are from Figure S1.

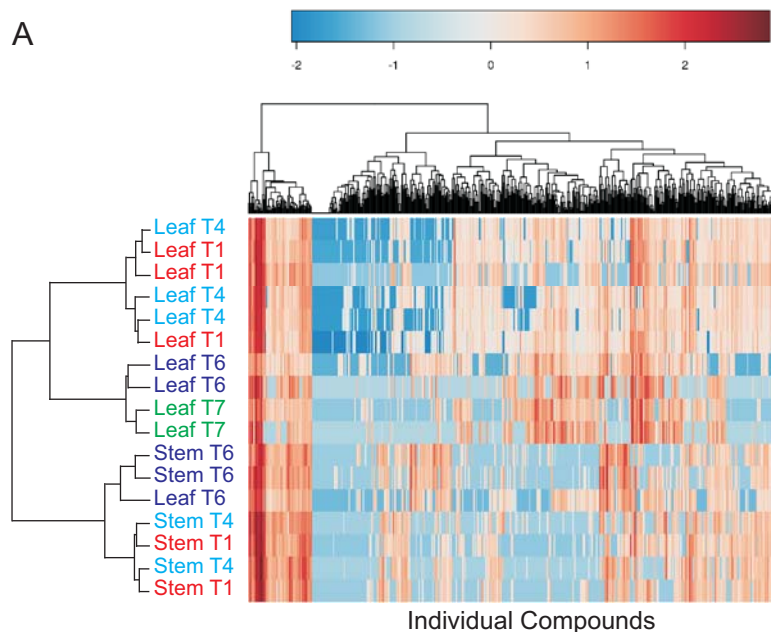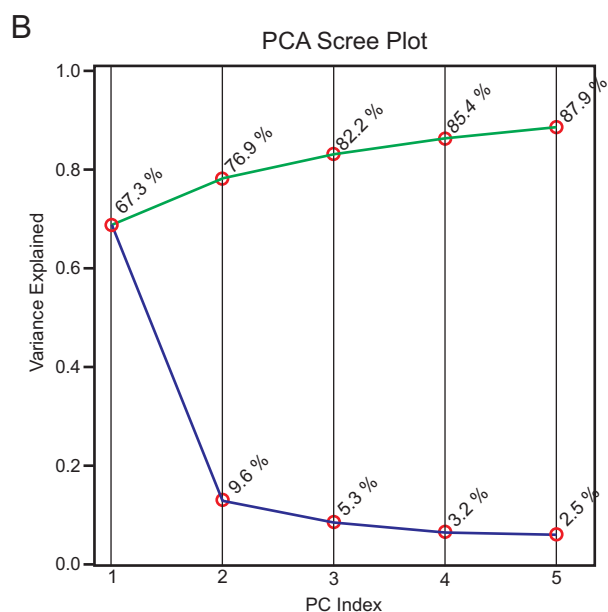

**Figure S3.** Multivariate analysis of metabolite data obtained for *S. habrochaites*, accession LA1777, the only accession that had readily isolatable trichomes for all types (Types 1, 4, 6 and 7) demonstrates that glandular trichome Types 1 and 4, which are clearly different from Types 6 and 7, are indistinguishable from each other. Principal components analysis (PCA, Figure 4A, 4D-4F), partial least squares-discriminant analysis (PLS-DA, Figure 4B and 4C) and hierarchical cluster analysis (panel A above, this case using Ward's method with Euclidean distances) all failed to separate Type 1 and 4 trichomes based on overall metabolite profiles, regardless of method used for data normalization. The normalization used for the data presented above was log<sub>2</sub> transformed data. Panel B above shows the scree plot for data used to generate Figure 4 C - F).

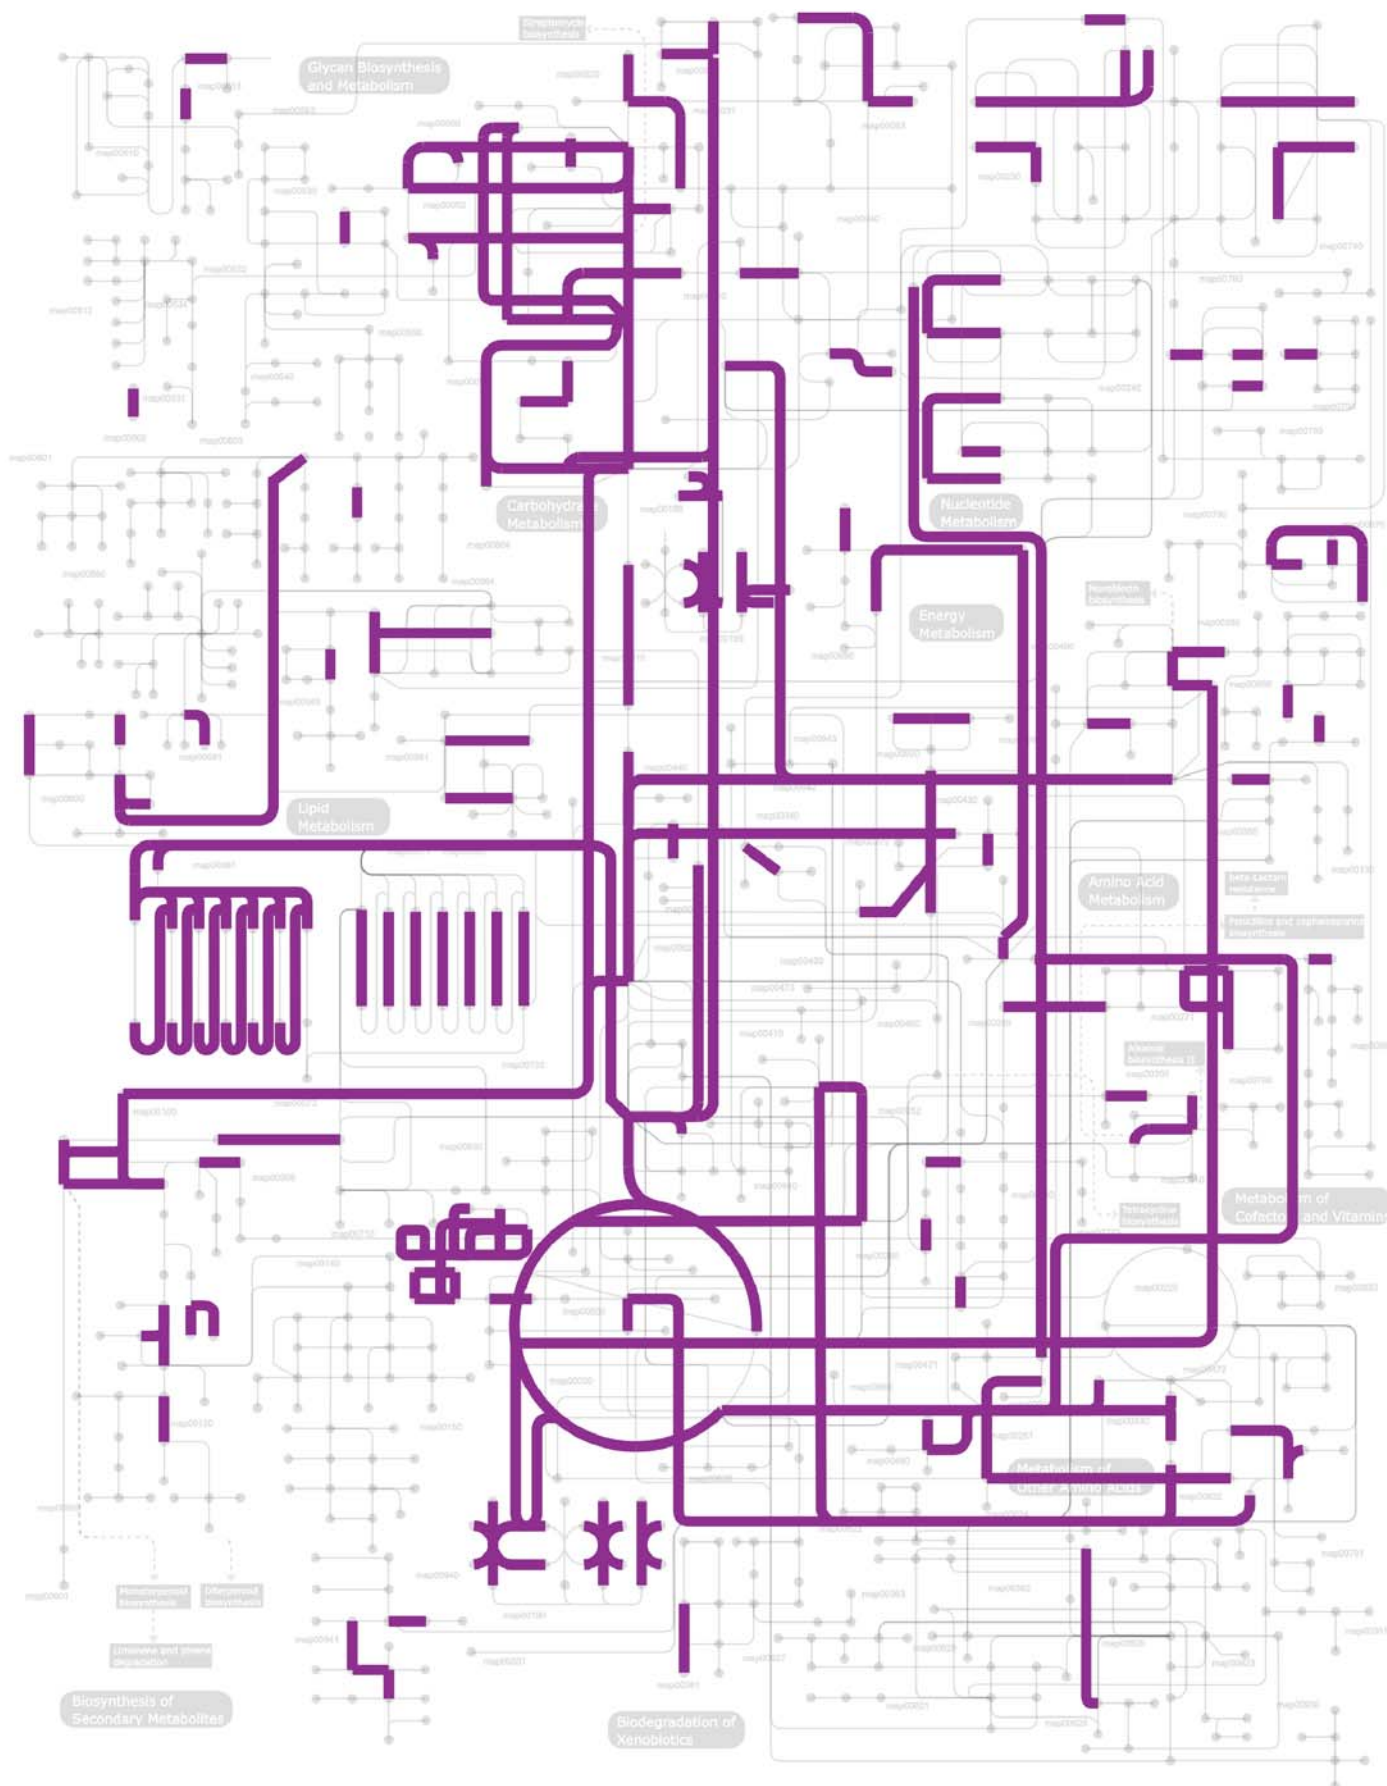

**Figure S4.** Biochemical pathways expressed in *S. habrochaites* type 6 glandular trichomes. Pathways highlighted in purple represent enzymes identified via EC queries on the PAVE system.

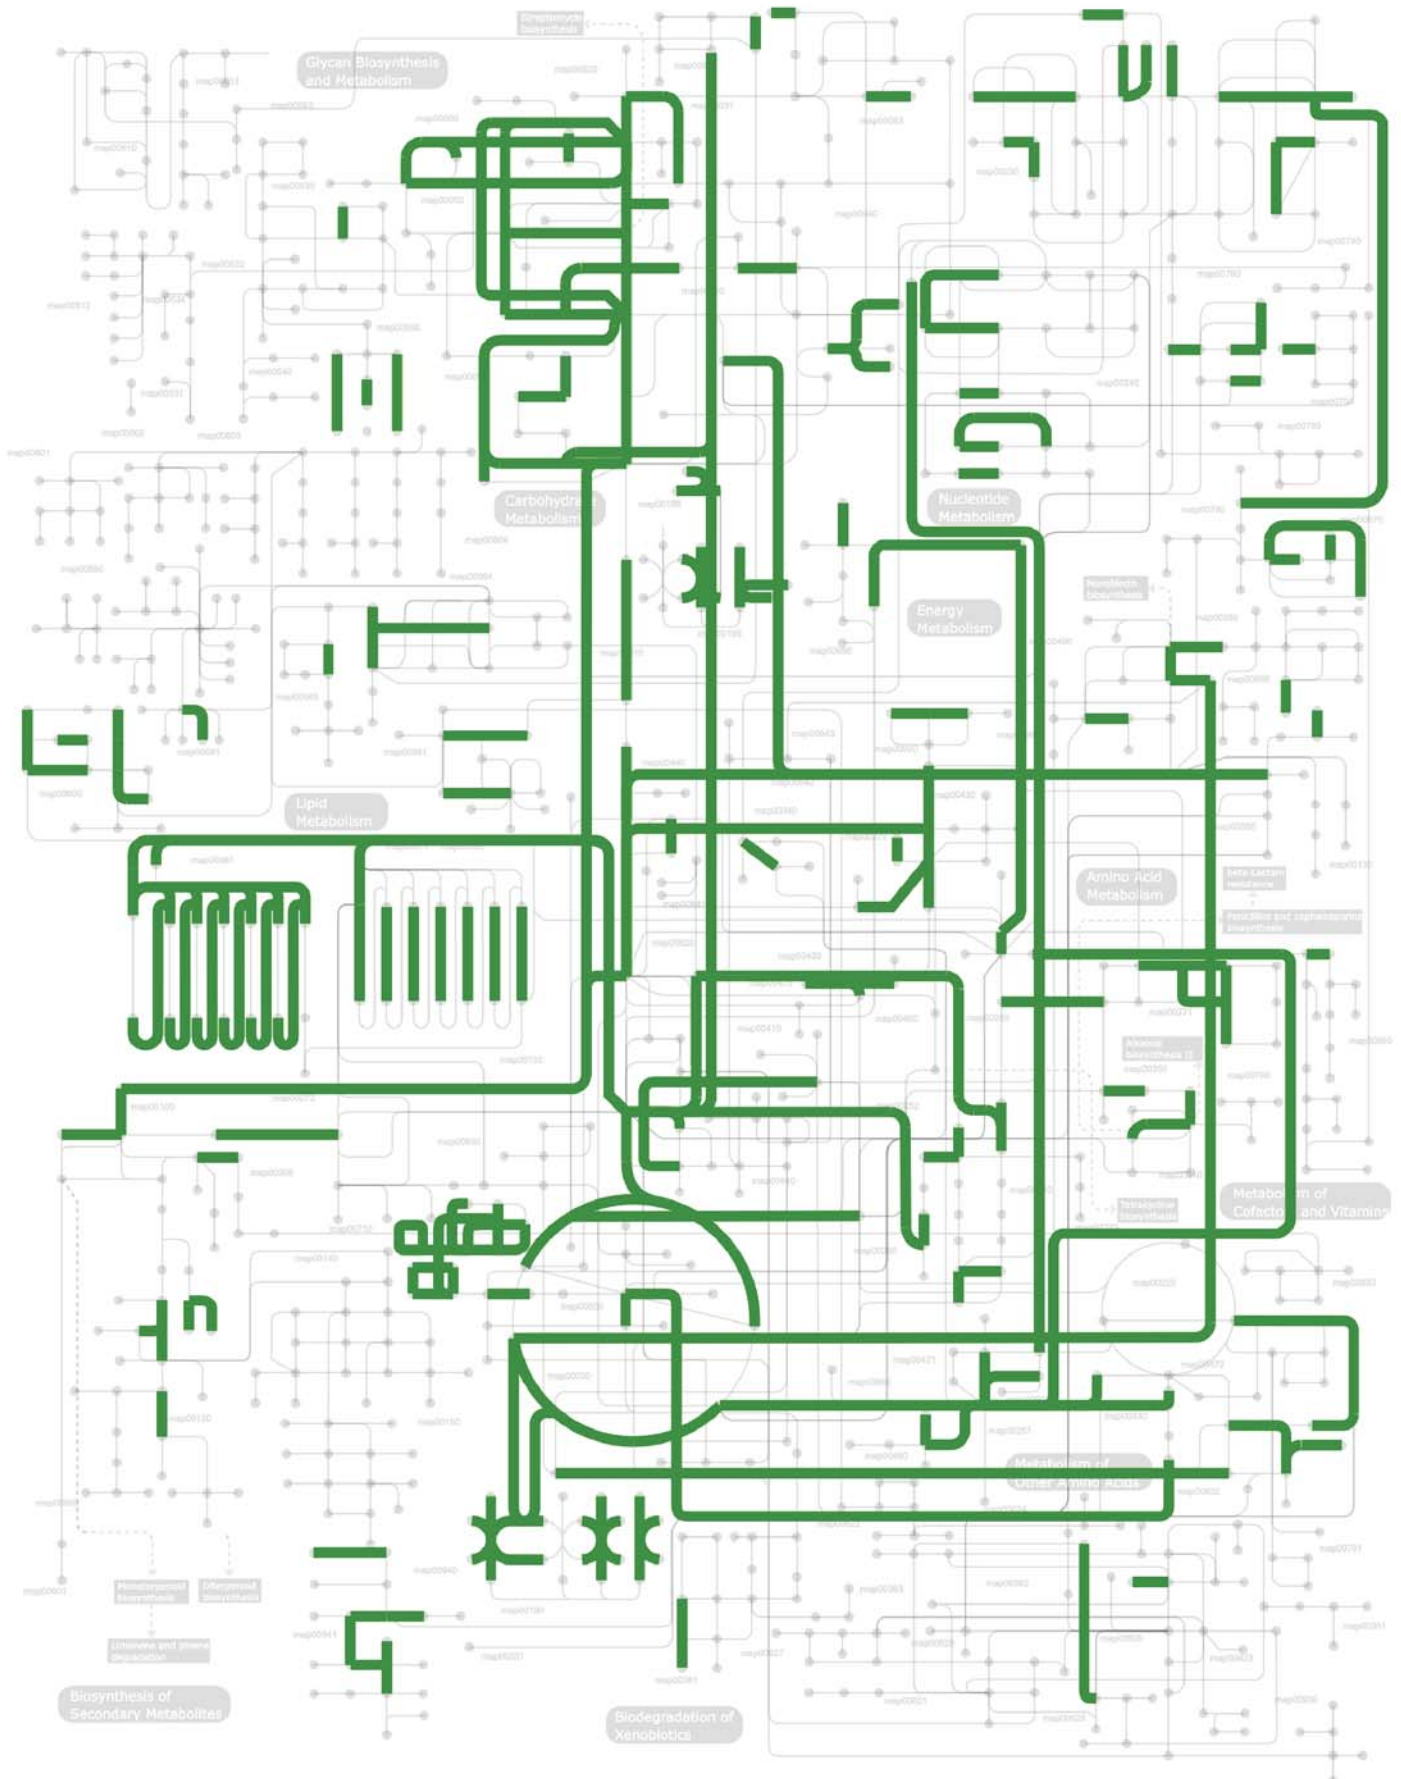

**Figure S5.** Biochemical pathways expressed in *S. lycopersicum* type 6 glandular trichomes. Pathways highlighted in green represent enzymes identified via EC queries on the PAVE system.

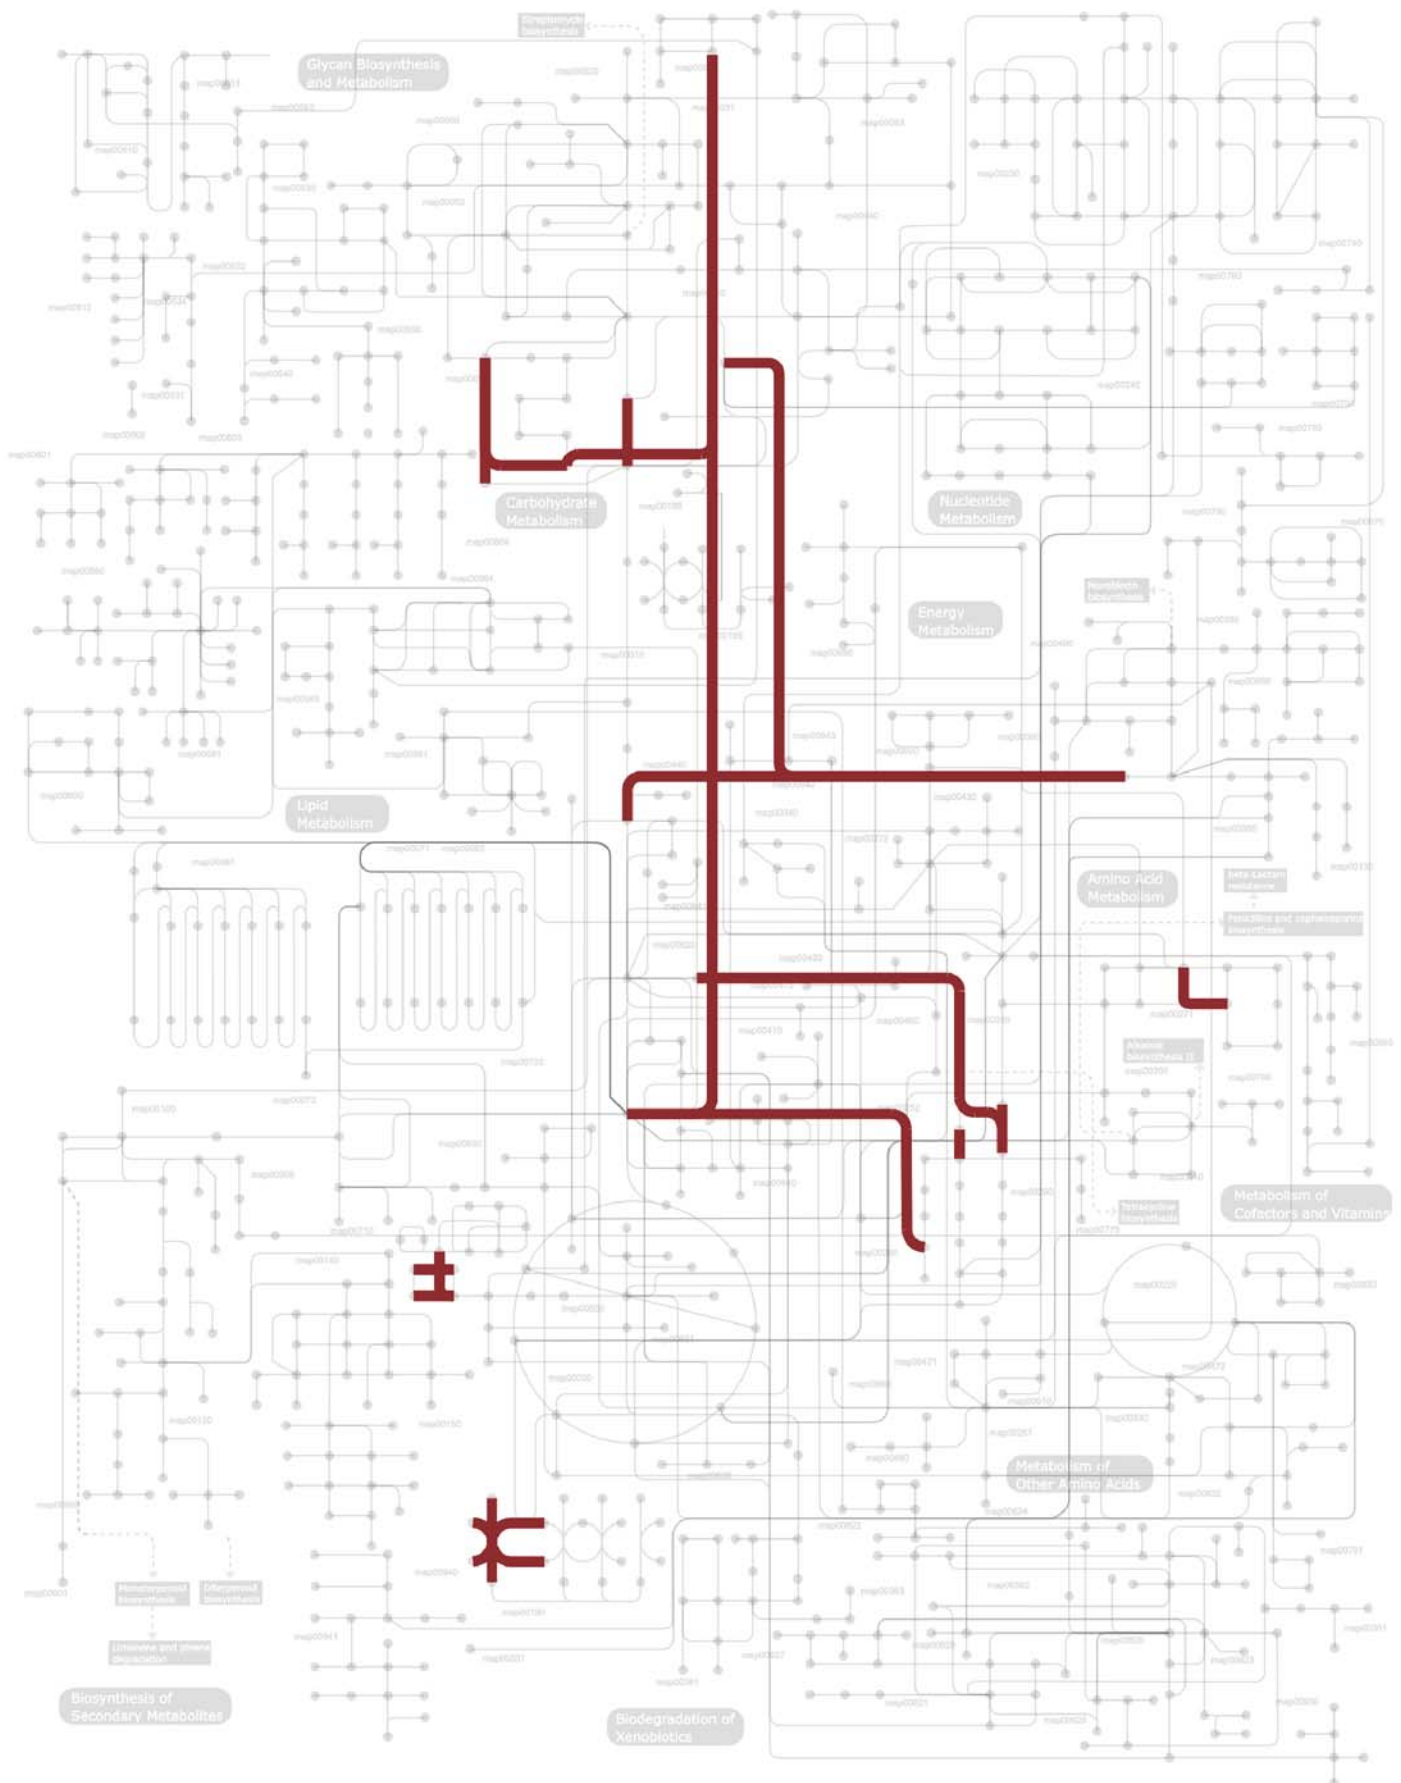

**Figure S6.** Biochemical pathways expressed in *S. pennellii* type 6 glandular trichomes. Pathways highlighted in maroon represent enzymes identified via blast searches with an E-value cutoff of  $1 \times 10^{-40}$  against the Uniprot databases.

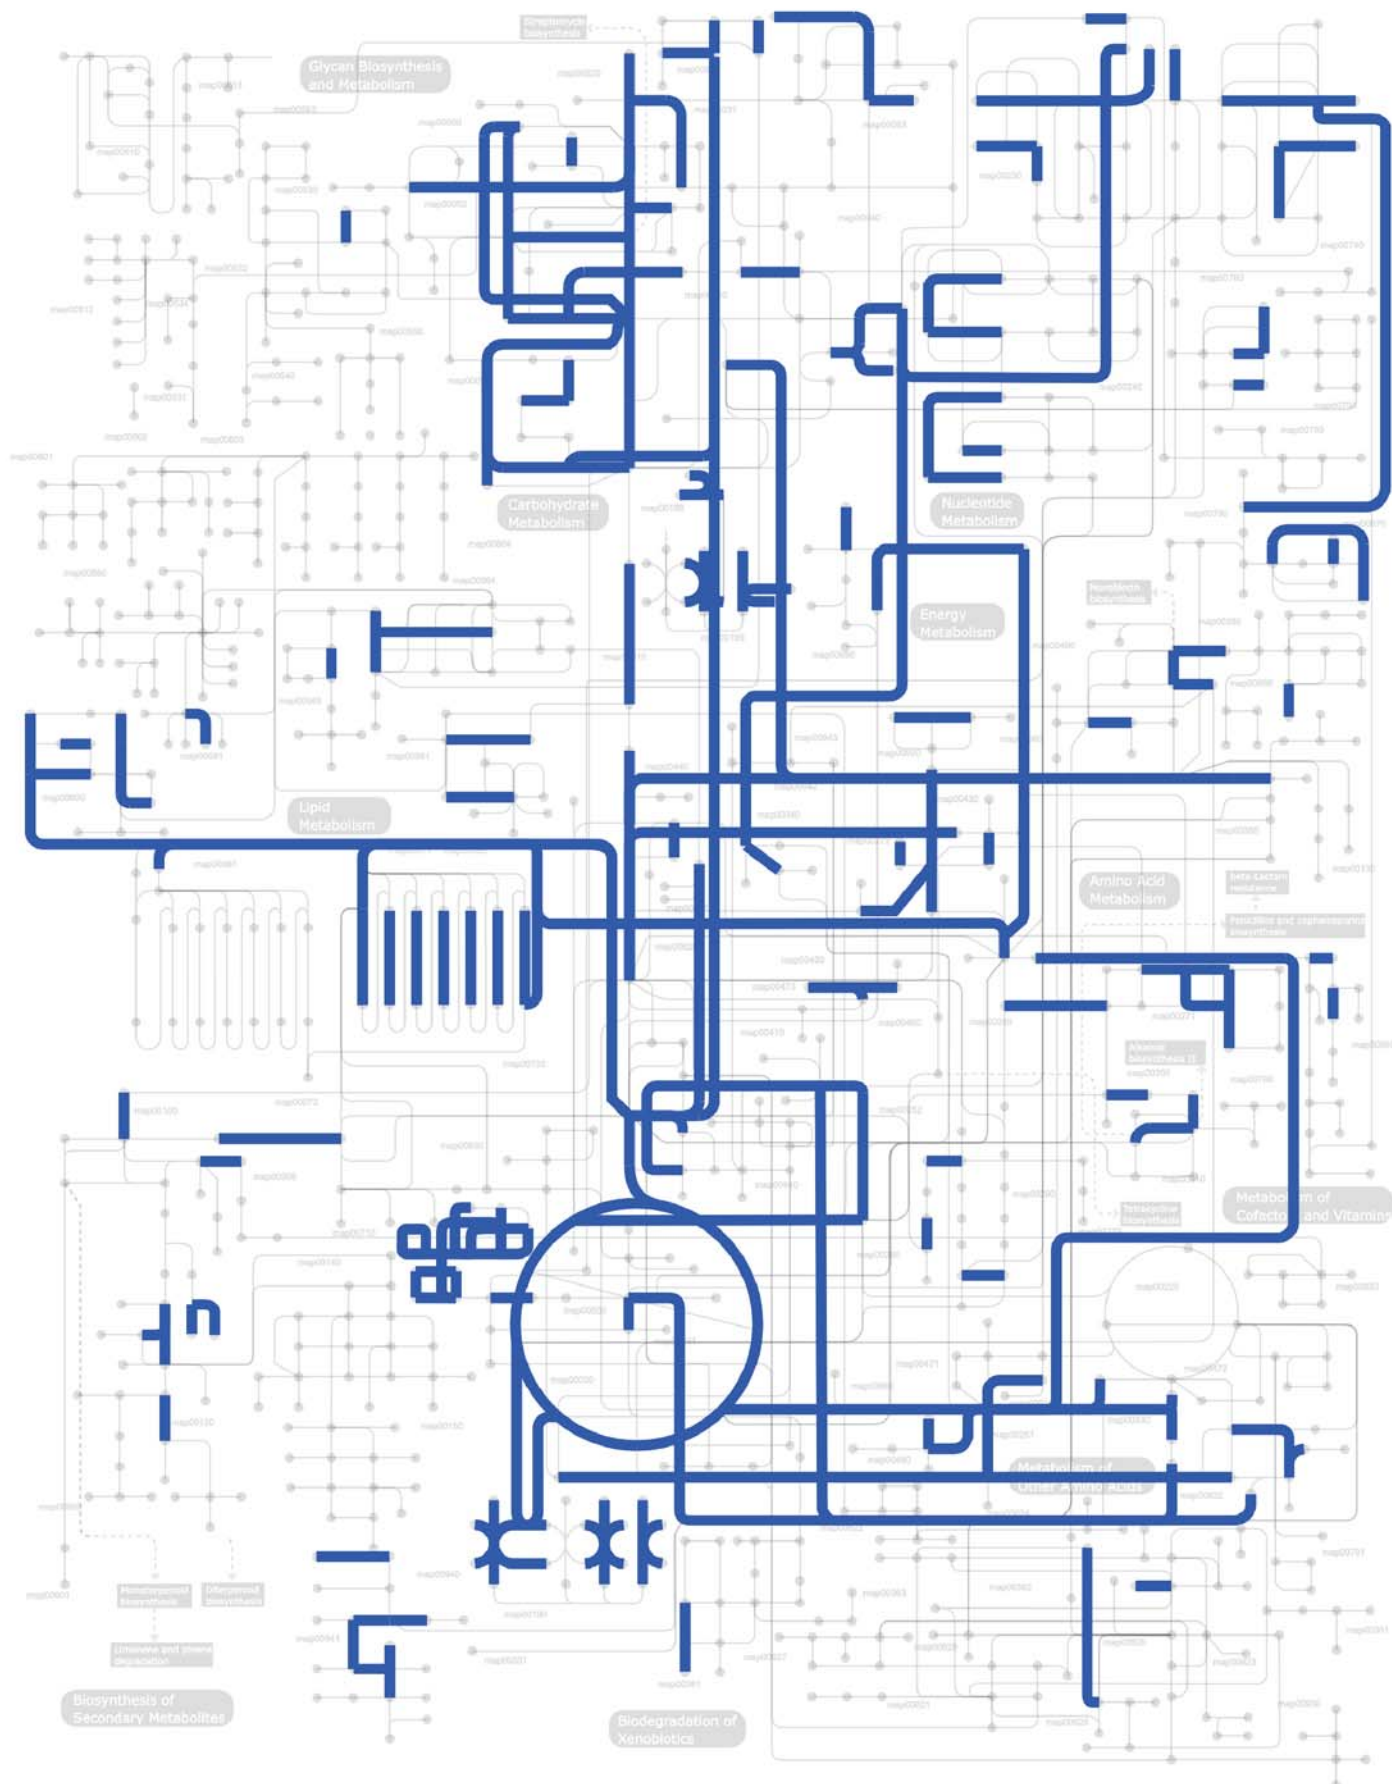

**Figure S7.** Biochemical pathways expressed in *S. pimpinellifolium* type 6 glandular trichomes. Pathways highlighted in blue represent enzymes identified via EC queries on the PAVE system.

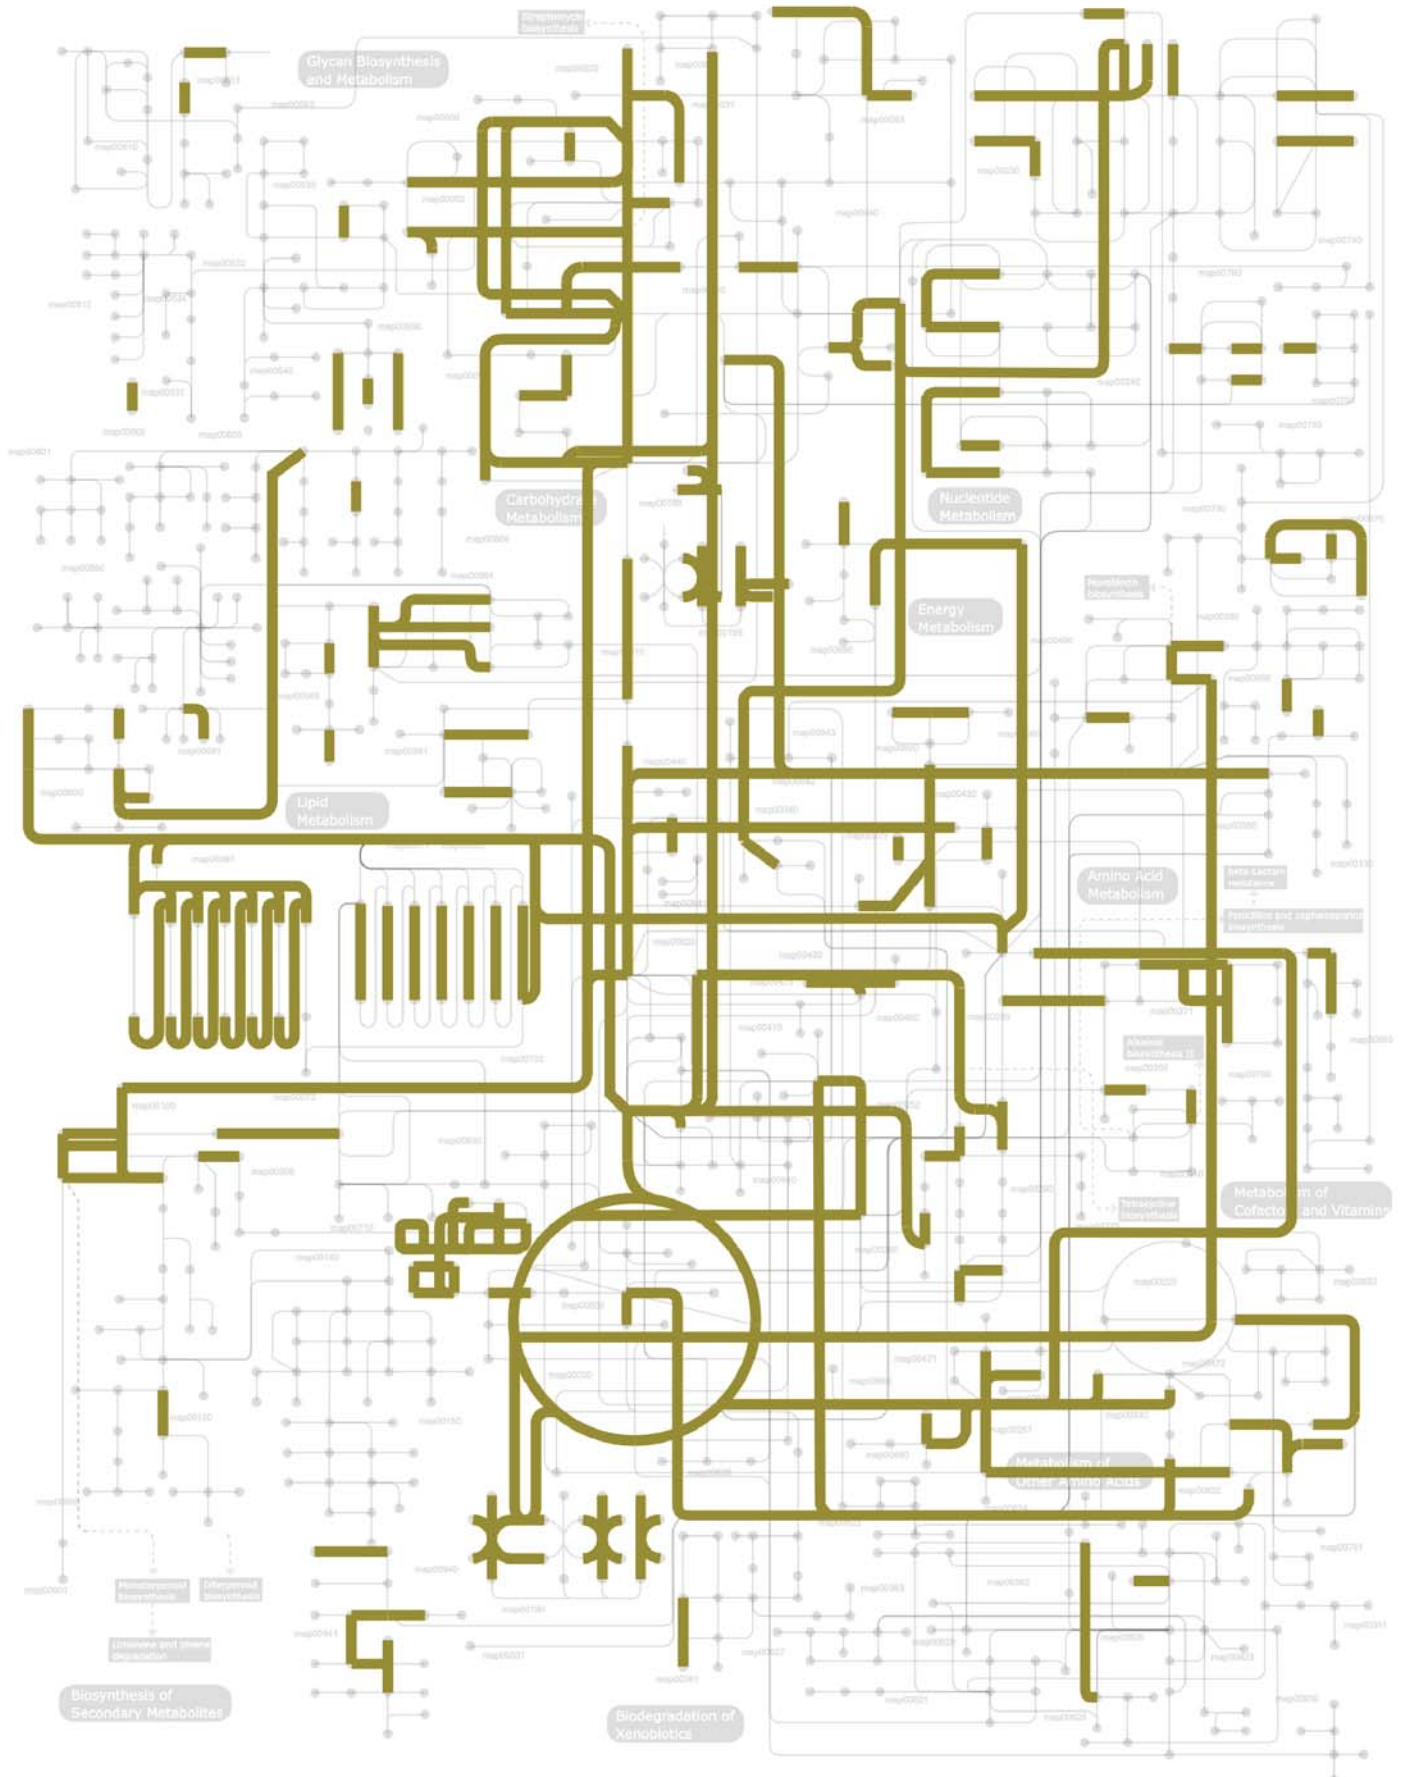

**Figure S8.** Biochemical pathways expressed in *S. arcanum* type 6 glandular trichomes. Pathways highlighted in olive represent enzymes identified via blast searches with an E-value cutoff of  $1 \times 10^{-40}$  against the Uniprot databases.



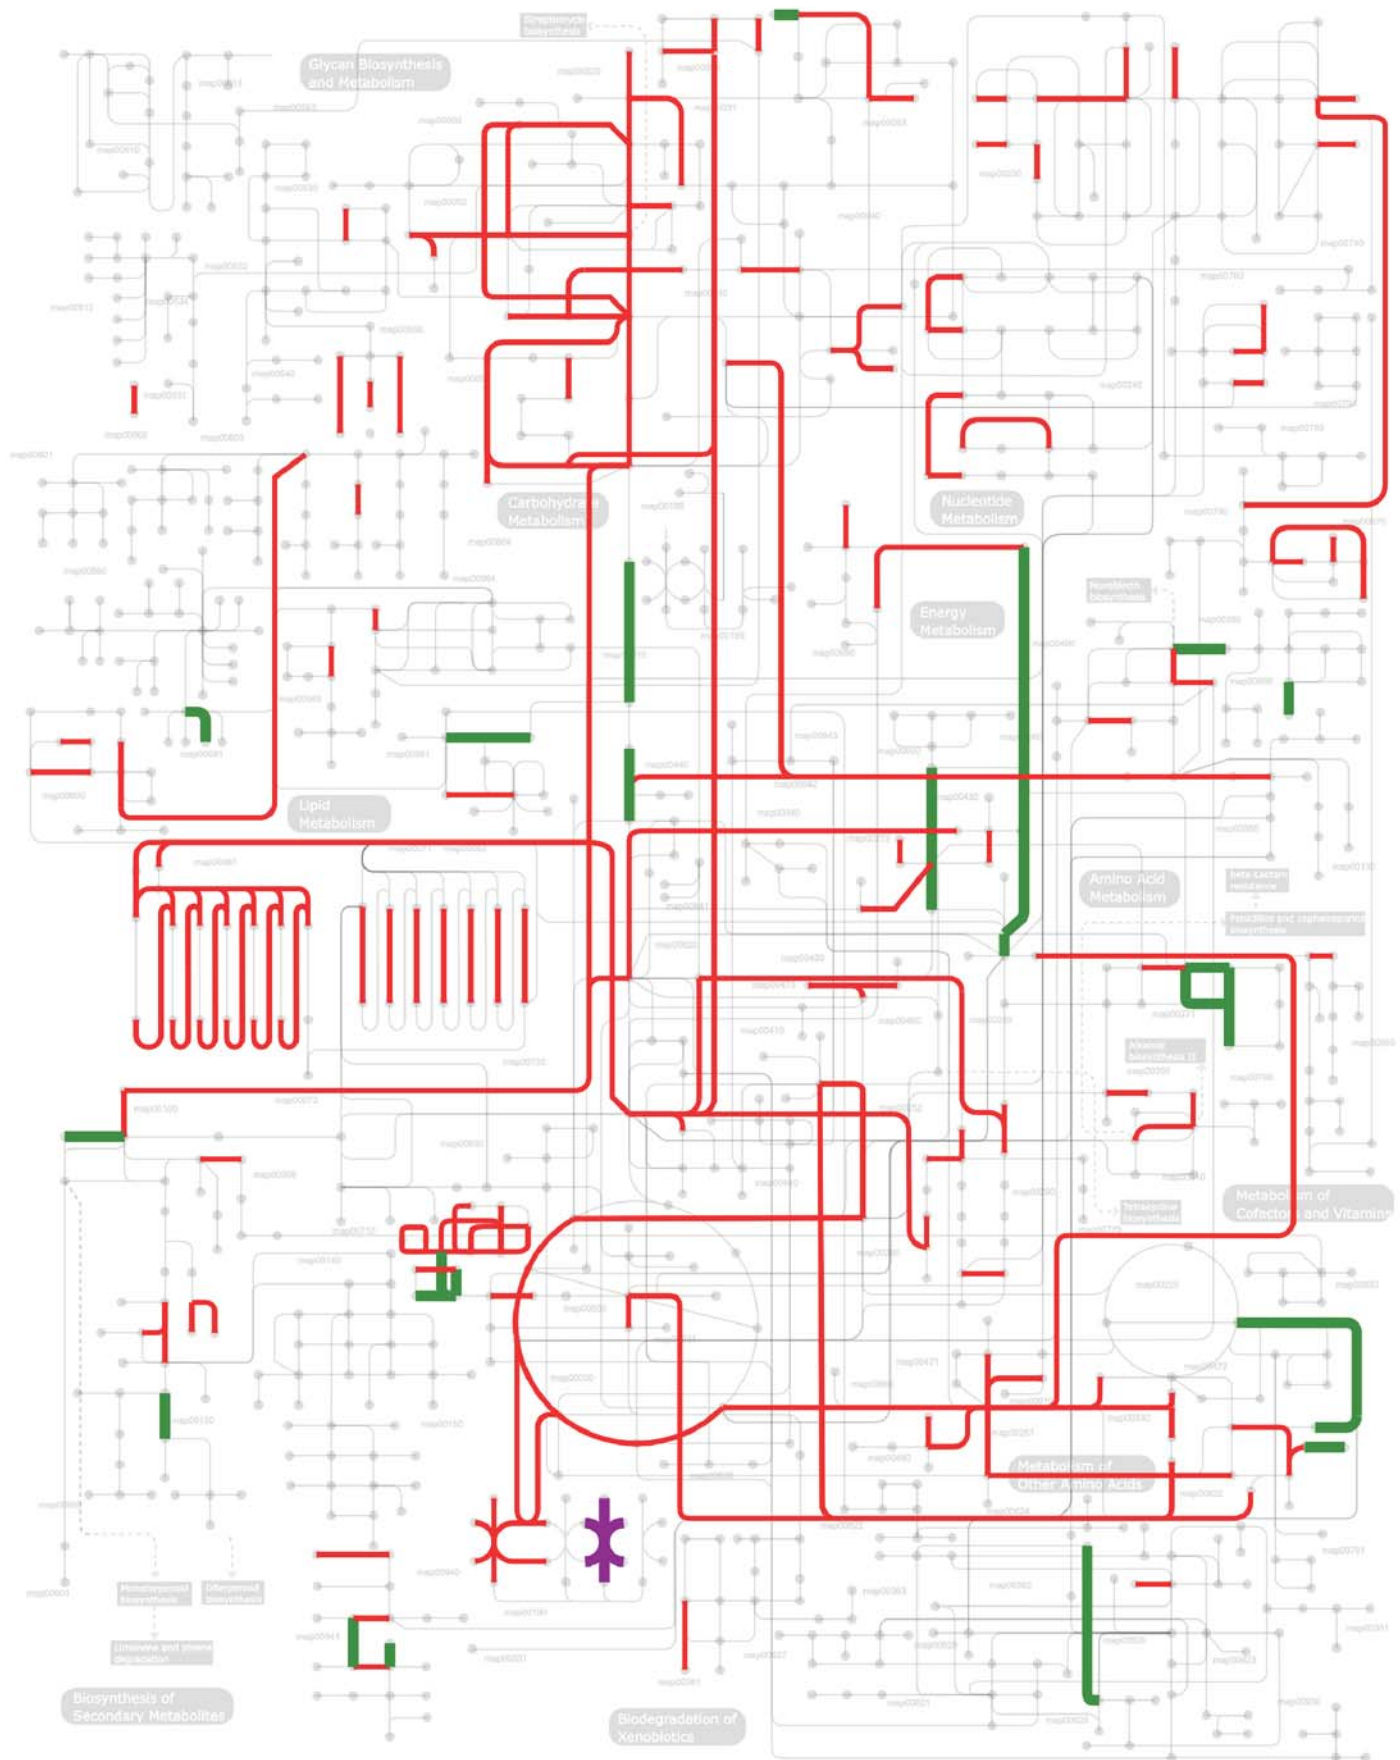

**Figure S9** Biochemical pathways preferentially expressed in either *S. habrochaites* type 6 or *S. lycopersicum* type 6 glandular trichomes when queried by Uniprot ID. Pathways highlighted in red are present in both species but not at significantly different levels. Pathways highlighted in green are preferentially expressed in *S. lycopersicum* while pathways preferentially expressed in *S. habrochaites* are in purple.

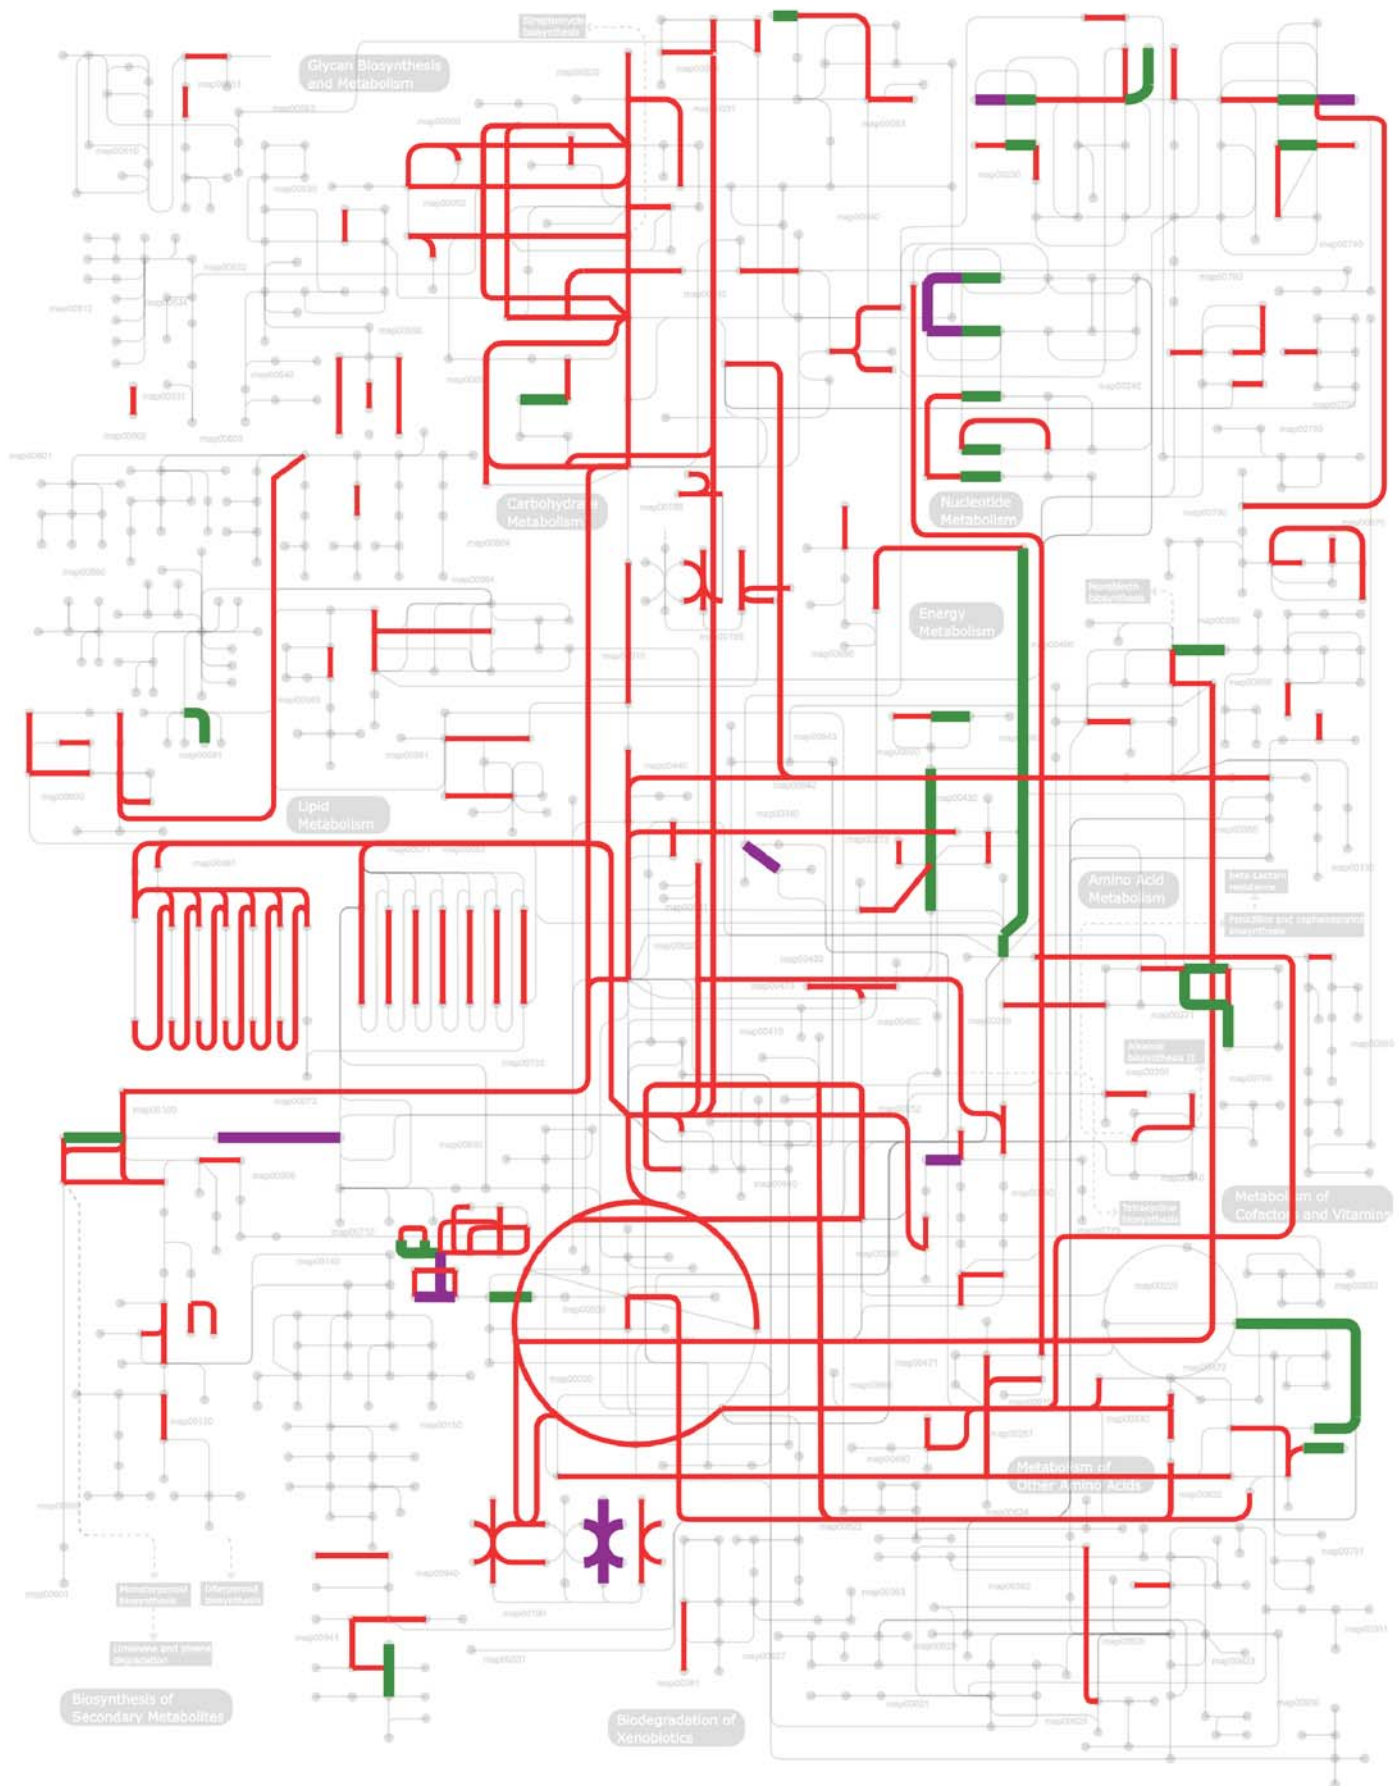

**Figure S10.** Biochemical pathways preferentially expressed in either *S. habrochaites* type 6 or *S. lycopersicum* type 6 glandular trichomes when queried by EC number. Pathways highlighted in red are present in both species but at not significantly different levels. Pathways highlighted in green are preferentially expressed in *S. lycopersicum* while pathways preferentially expressed in *S. habrochaites* are in purple.

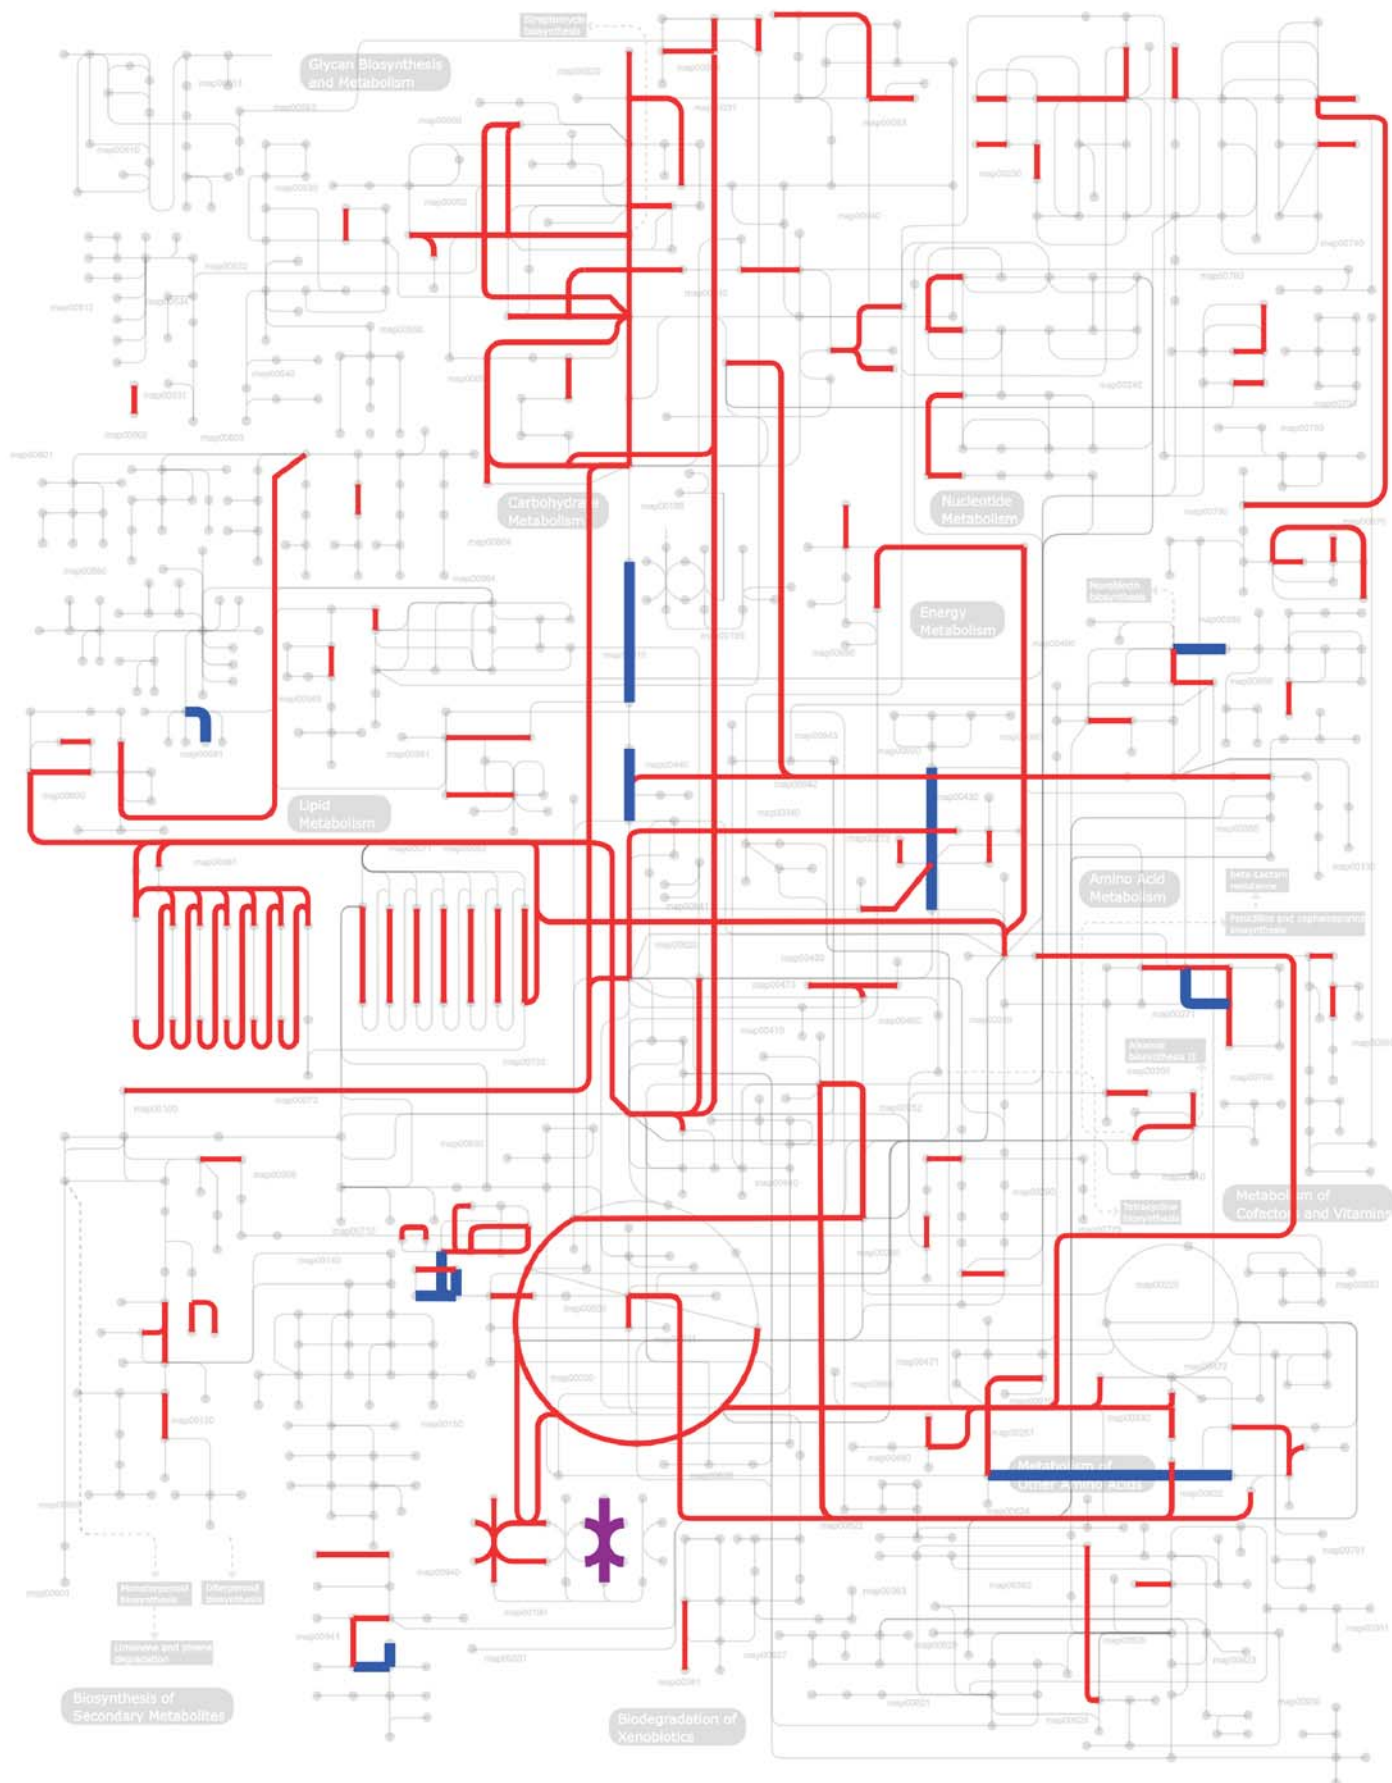

**Figure S11.** Biochemical pathways preferentially expressed in either *S. habrochaites* type 6 or *S. pimpinellifolium* type 6 glandular trichomes when queried by Uniprot ID. Pathways highlighted in red are present in both species but at not significantly different levels. Pathways highlighted in blue are preferentially expressed in *S. pimpinellifolium* while pathways preferentially expressed in *S. habrochaites* are in purple.

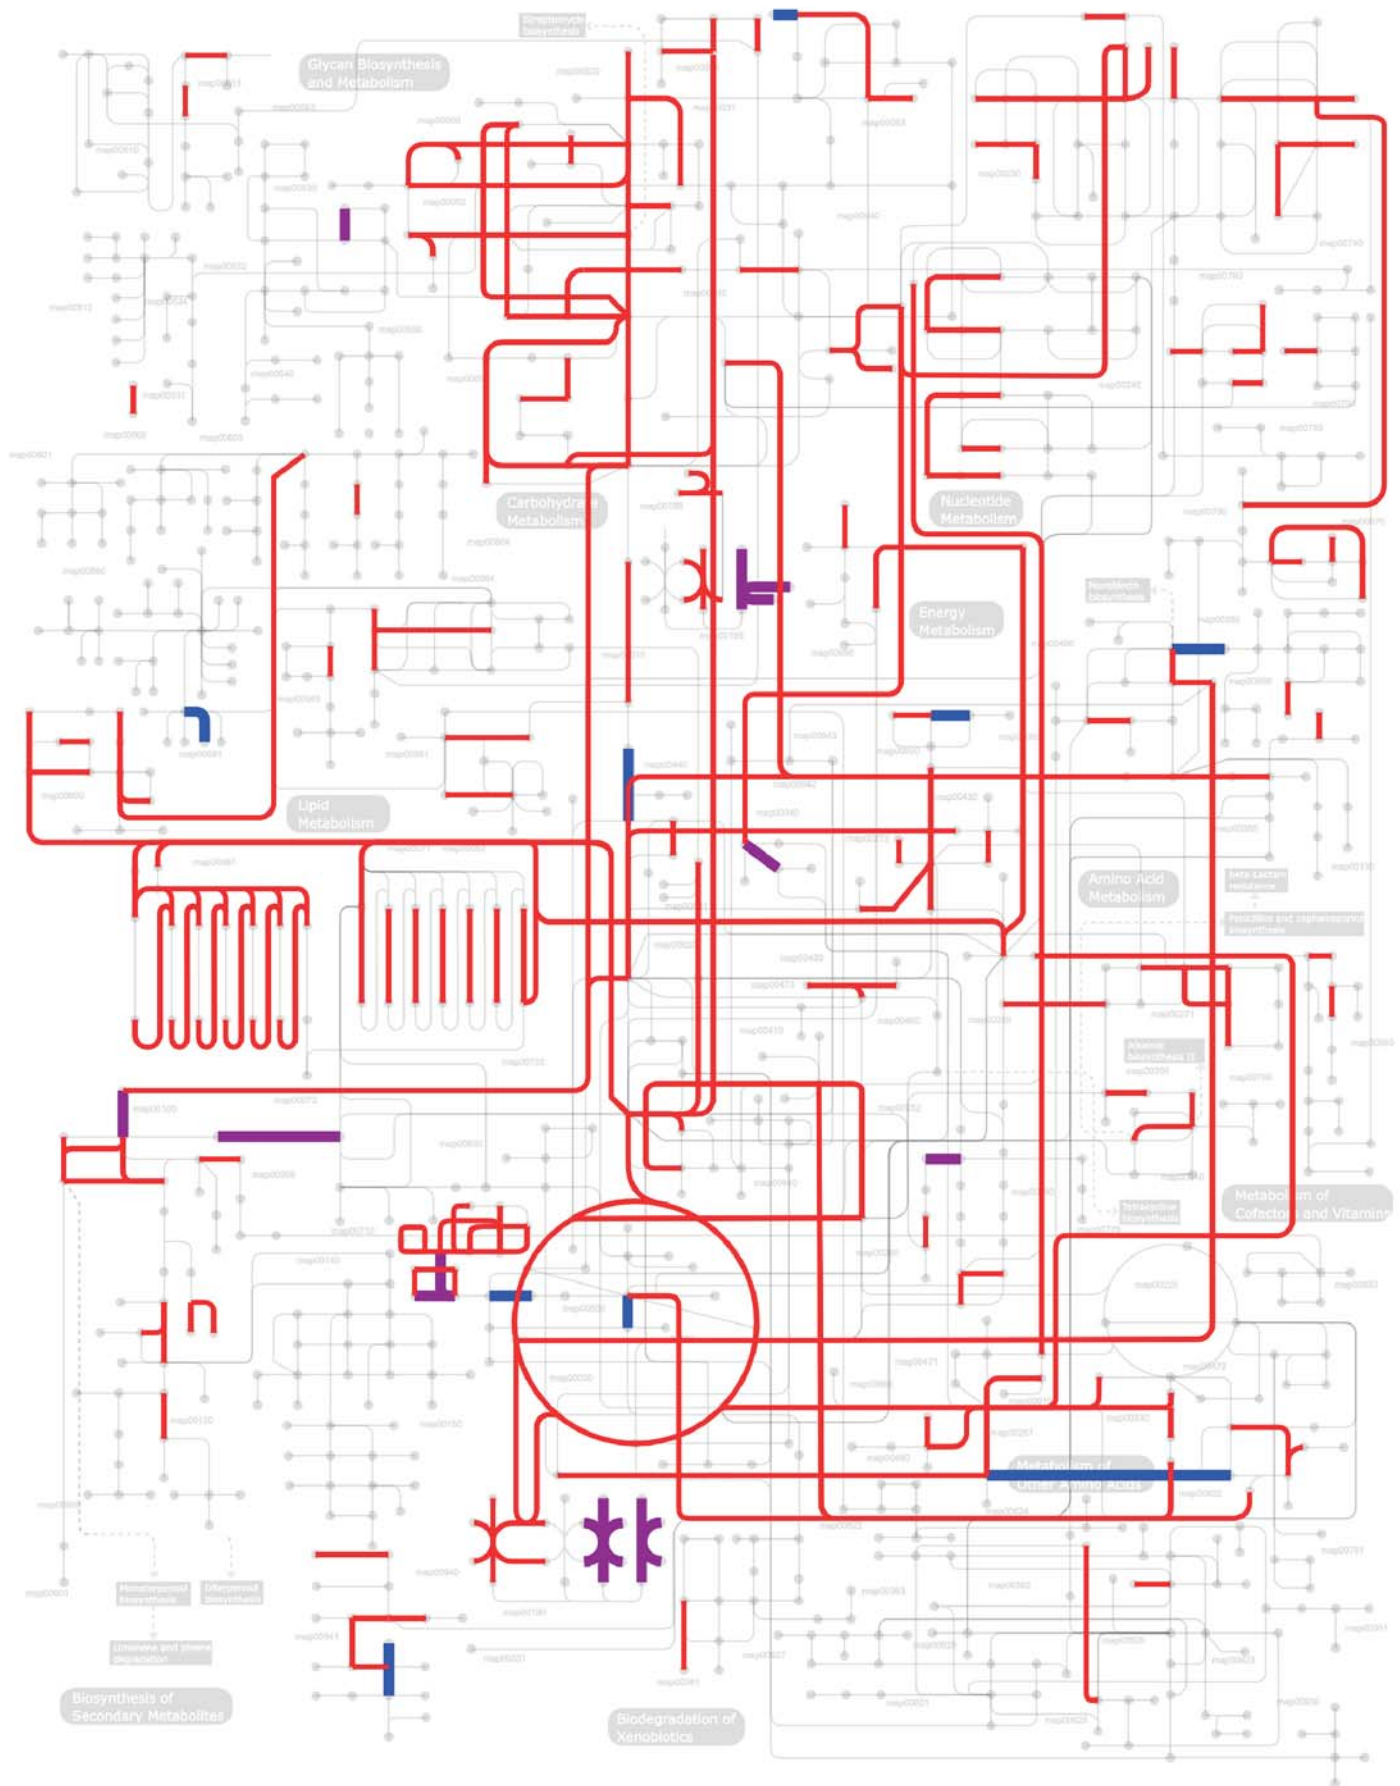

**Figure S12.** Biochemical pathways preferentially expressed in either *S. habrochaites* type 6 or *S. pimpinellifolium* type 6 glandular trichomes when queried by EC number. Pathways highlighted in red are present in both species but at not significantly different levels. Pathways highlighted in blue are preferentially expressed in *S. pimpinellifolium* while pathways preferentially expressed in *S. habrochaites* are in purple.

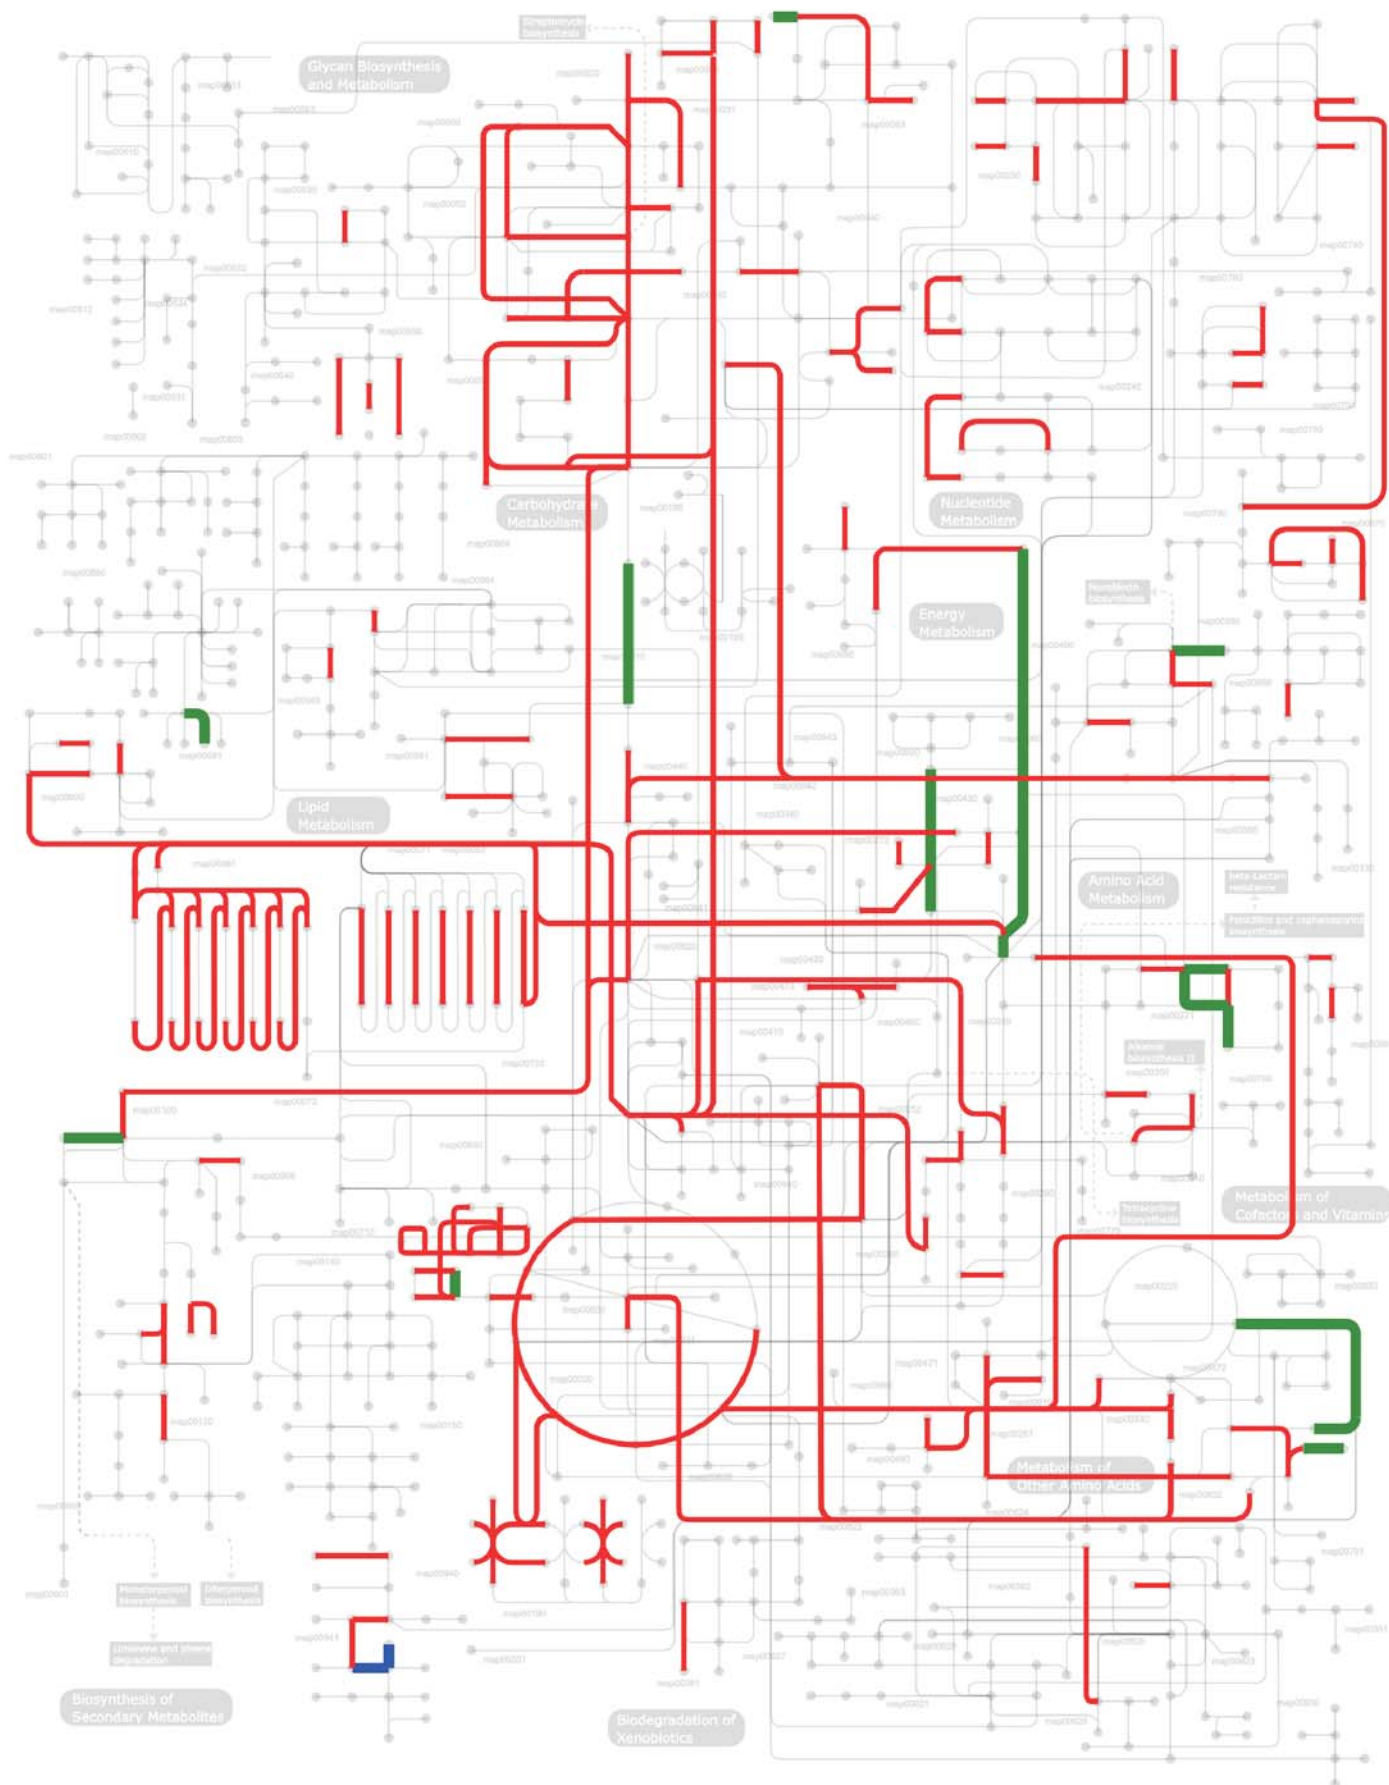

**Figure S13.** Biochemical pathways preferentially expressed in either *S. lycopersicum* type 6 or *S. pimpinellifolium* type 6 glandular trichomes when queried by Uniprot ID. Pathways highlighted in red are present in both species but at not significantly different levels. Pathways highlighted in green are preferentially expressed in *S. lycopersicum* while pathways preferentially expressed in *S. pimpinellifolium* are in blue.

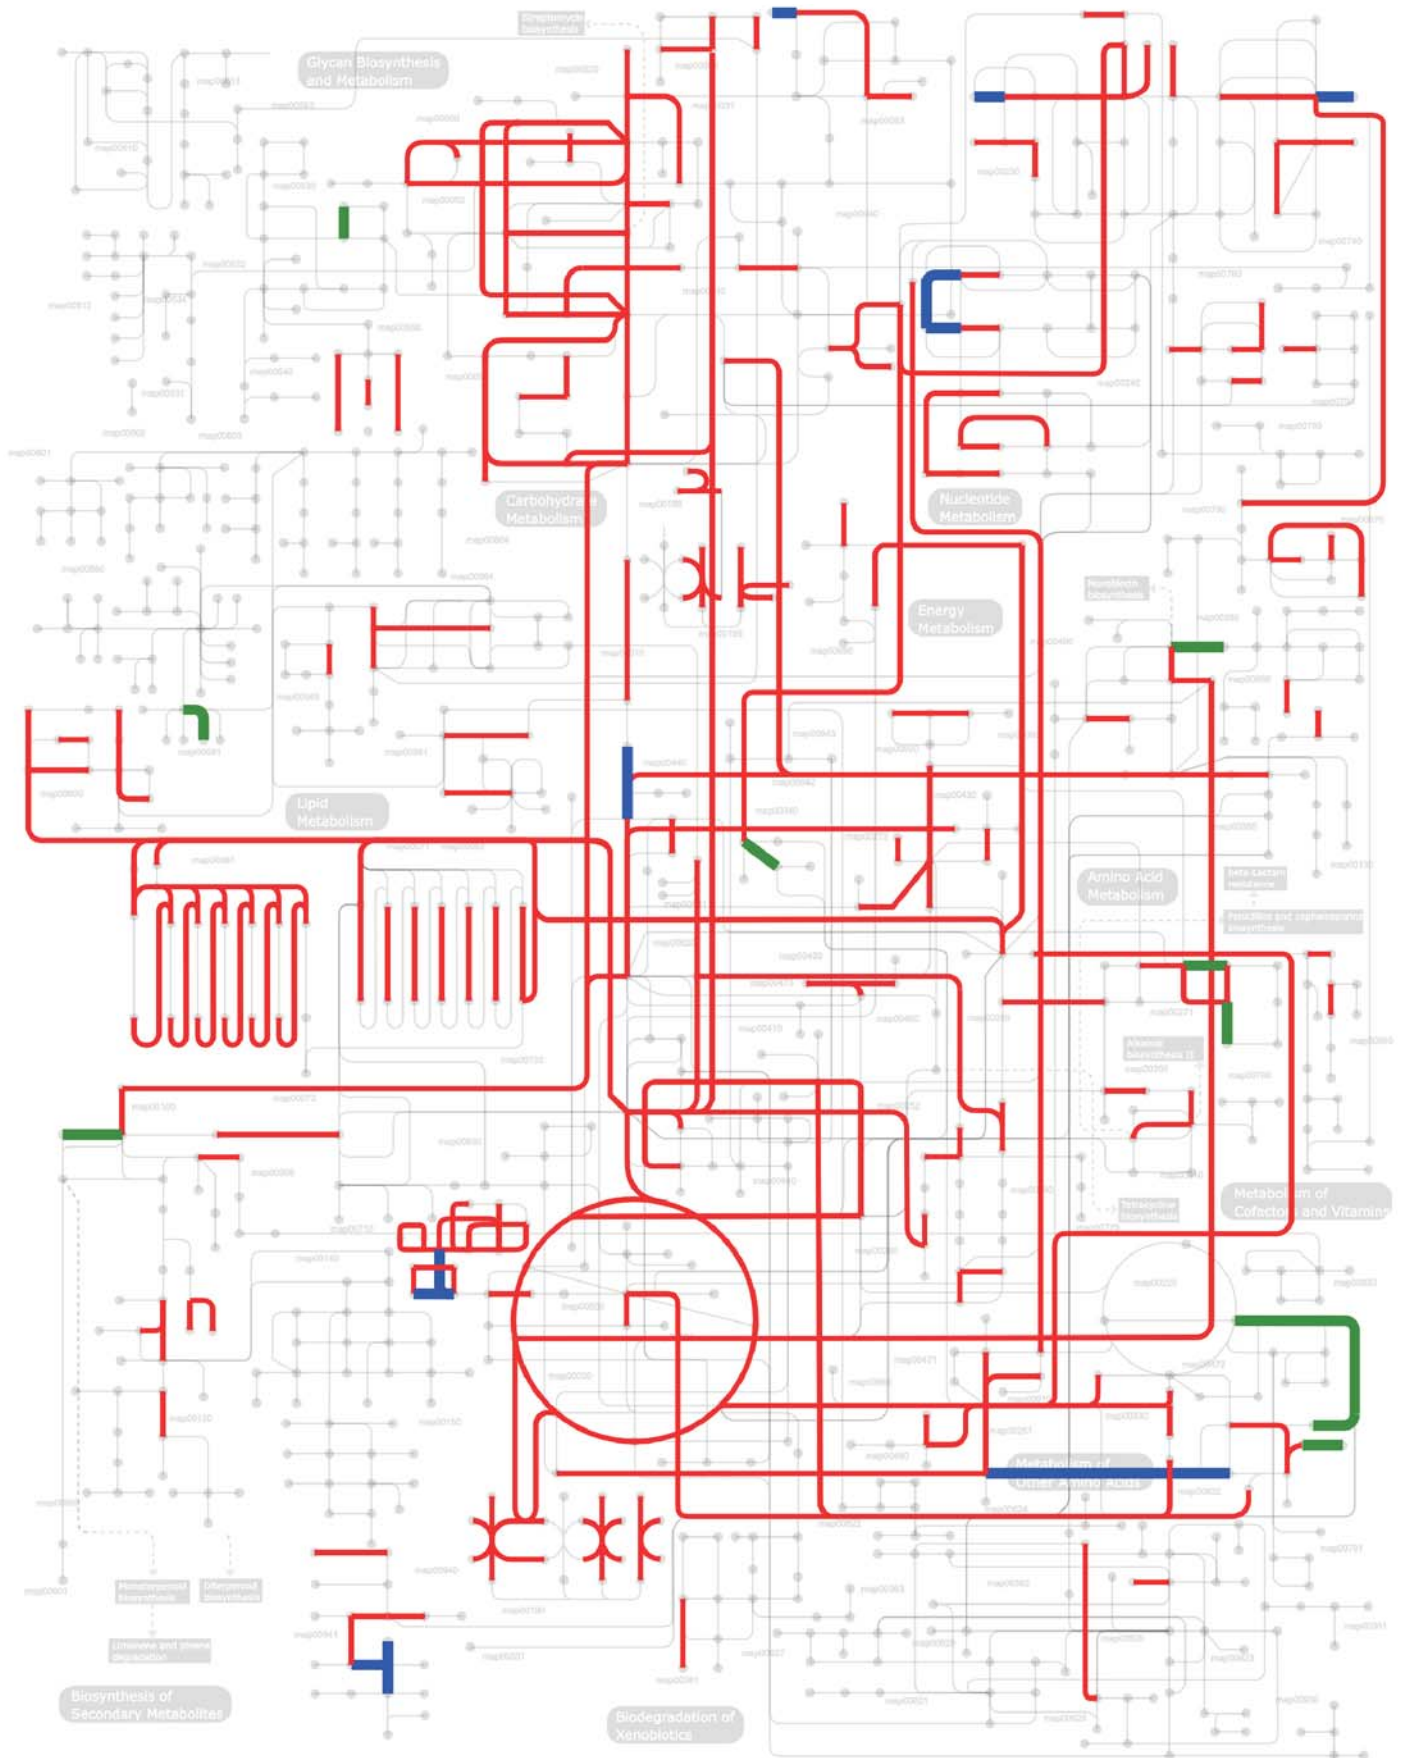

**Figure S14.** Biochemical pathways preferentially expressed in either *S. lycopersicum* type 6 or *S. pimpinellifolium* type 6 glandular trichomes when queried by EC number. Pathways highlighted in red are present in both species but at not significantly different levels. Pathways highlighted in green are preferentially expressed in *S. lycopersicum* while pathways preferentially expressed in *S. pimpinellifolium* are in blue.

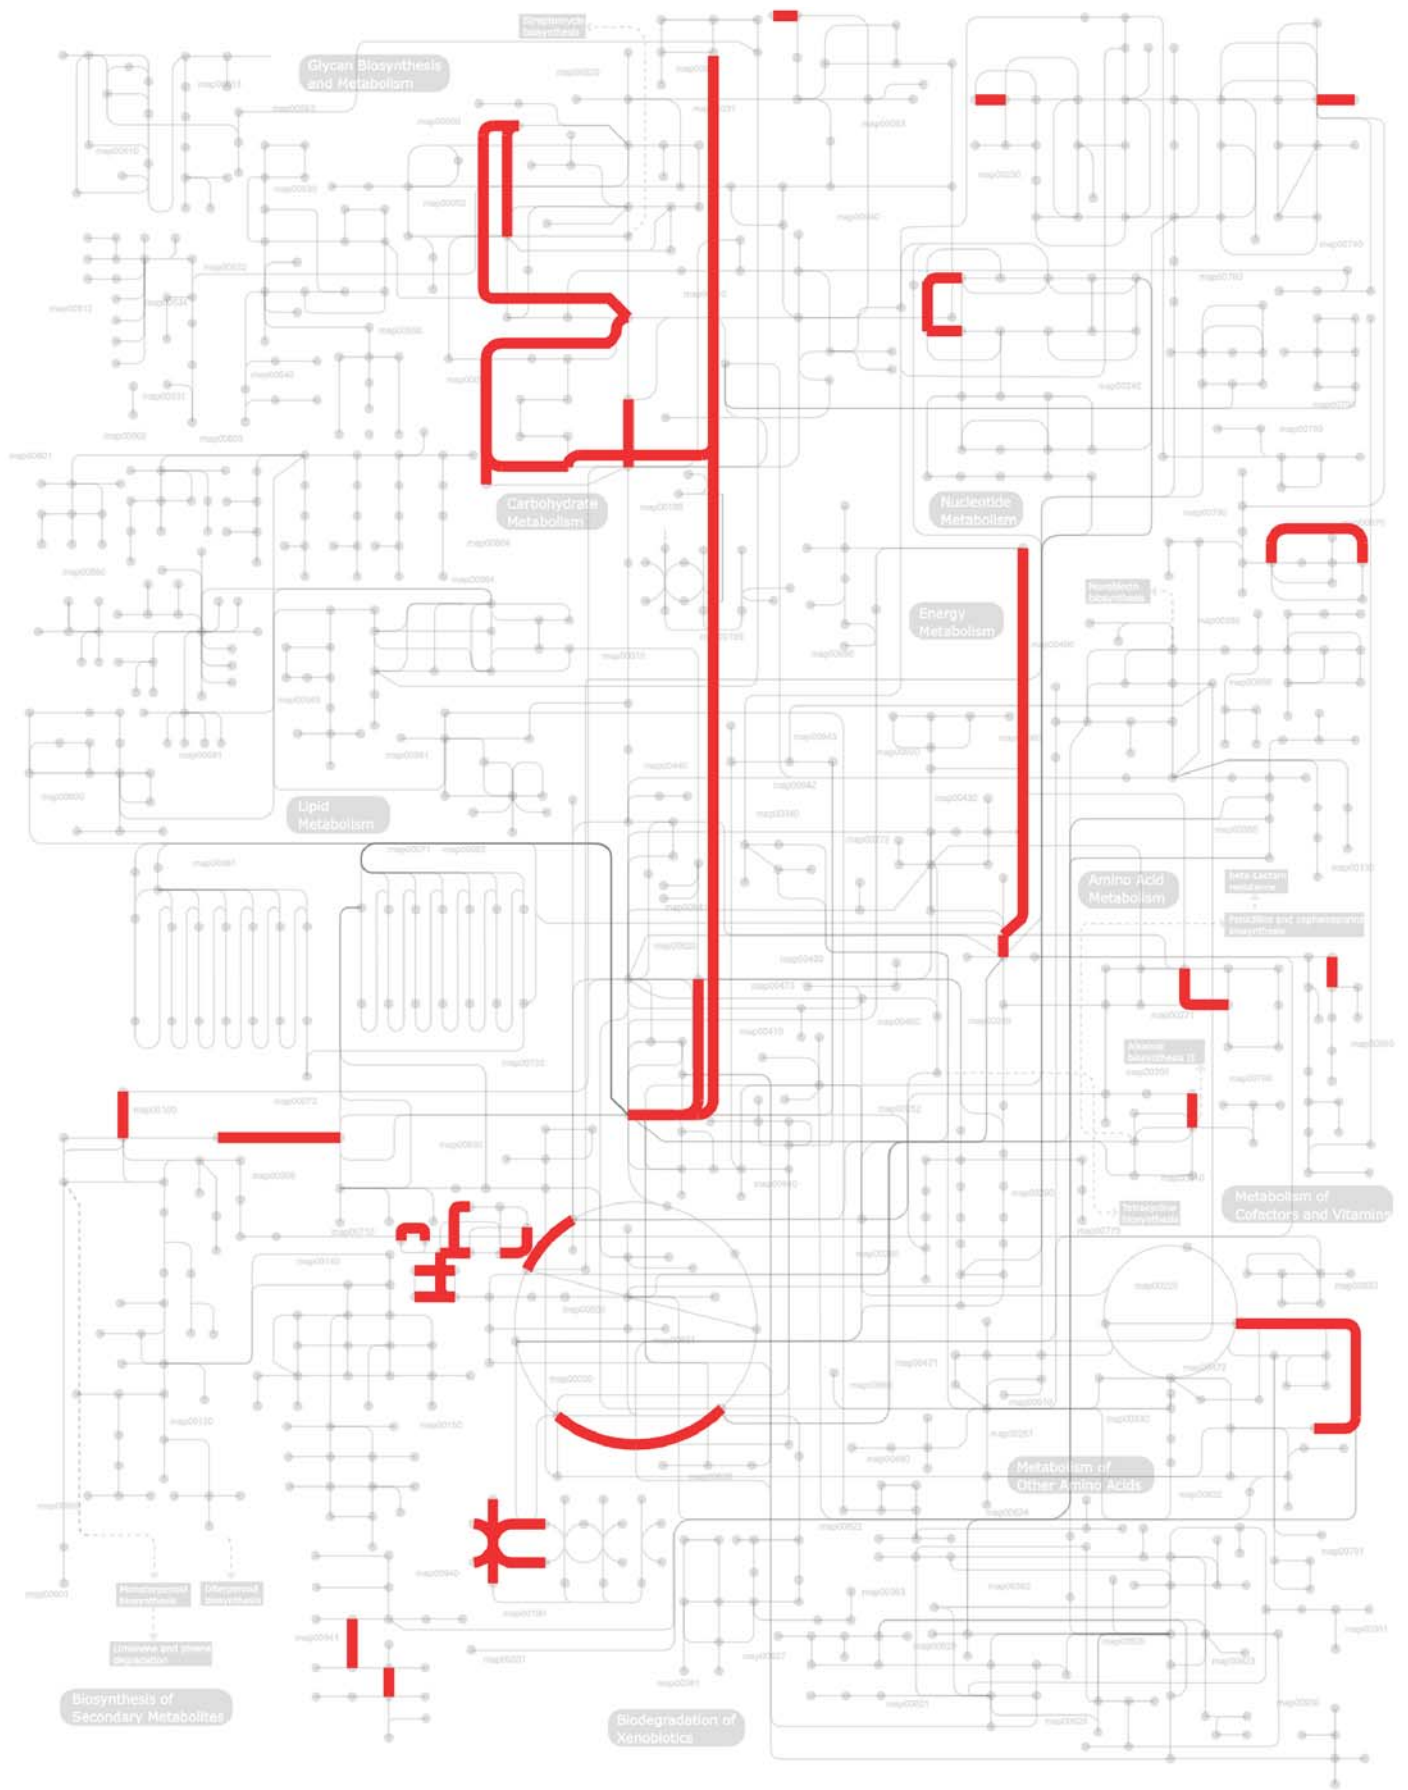

**Figure S15.** Biochemical pathways present in *S. habrochaites* type 1 and *S. habrochaites* type 4 glandular trichomes EST libraries when queried by EC number. Pathways highlighted in red represent biochemical pathways whose expression is present but not significantly different in either library.

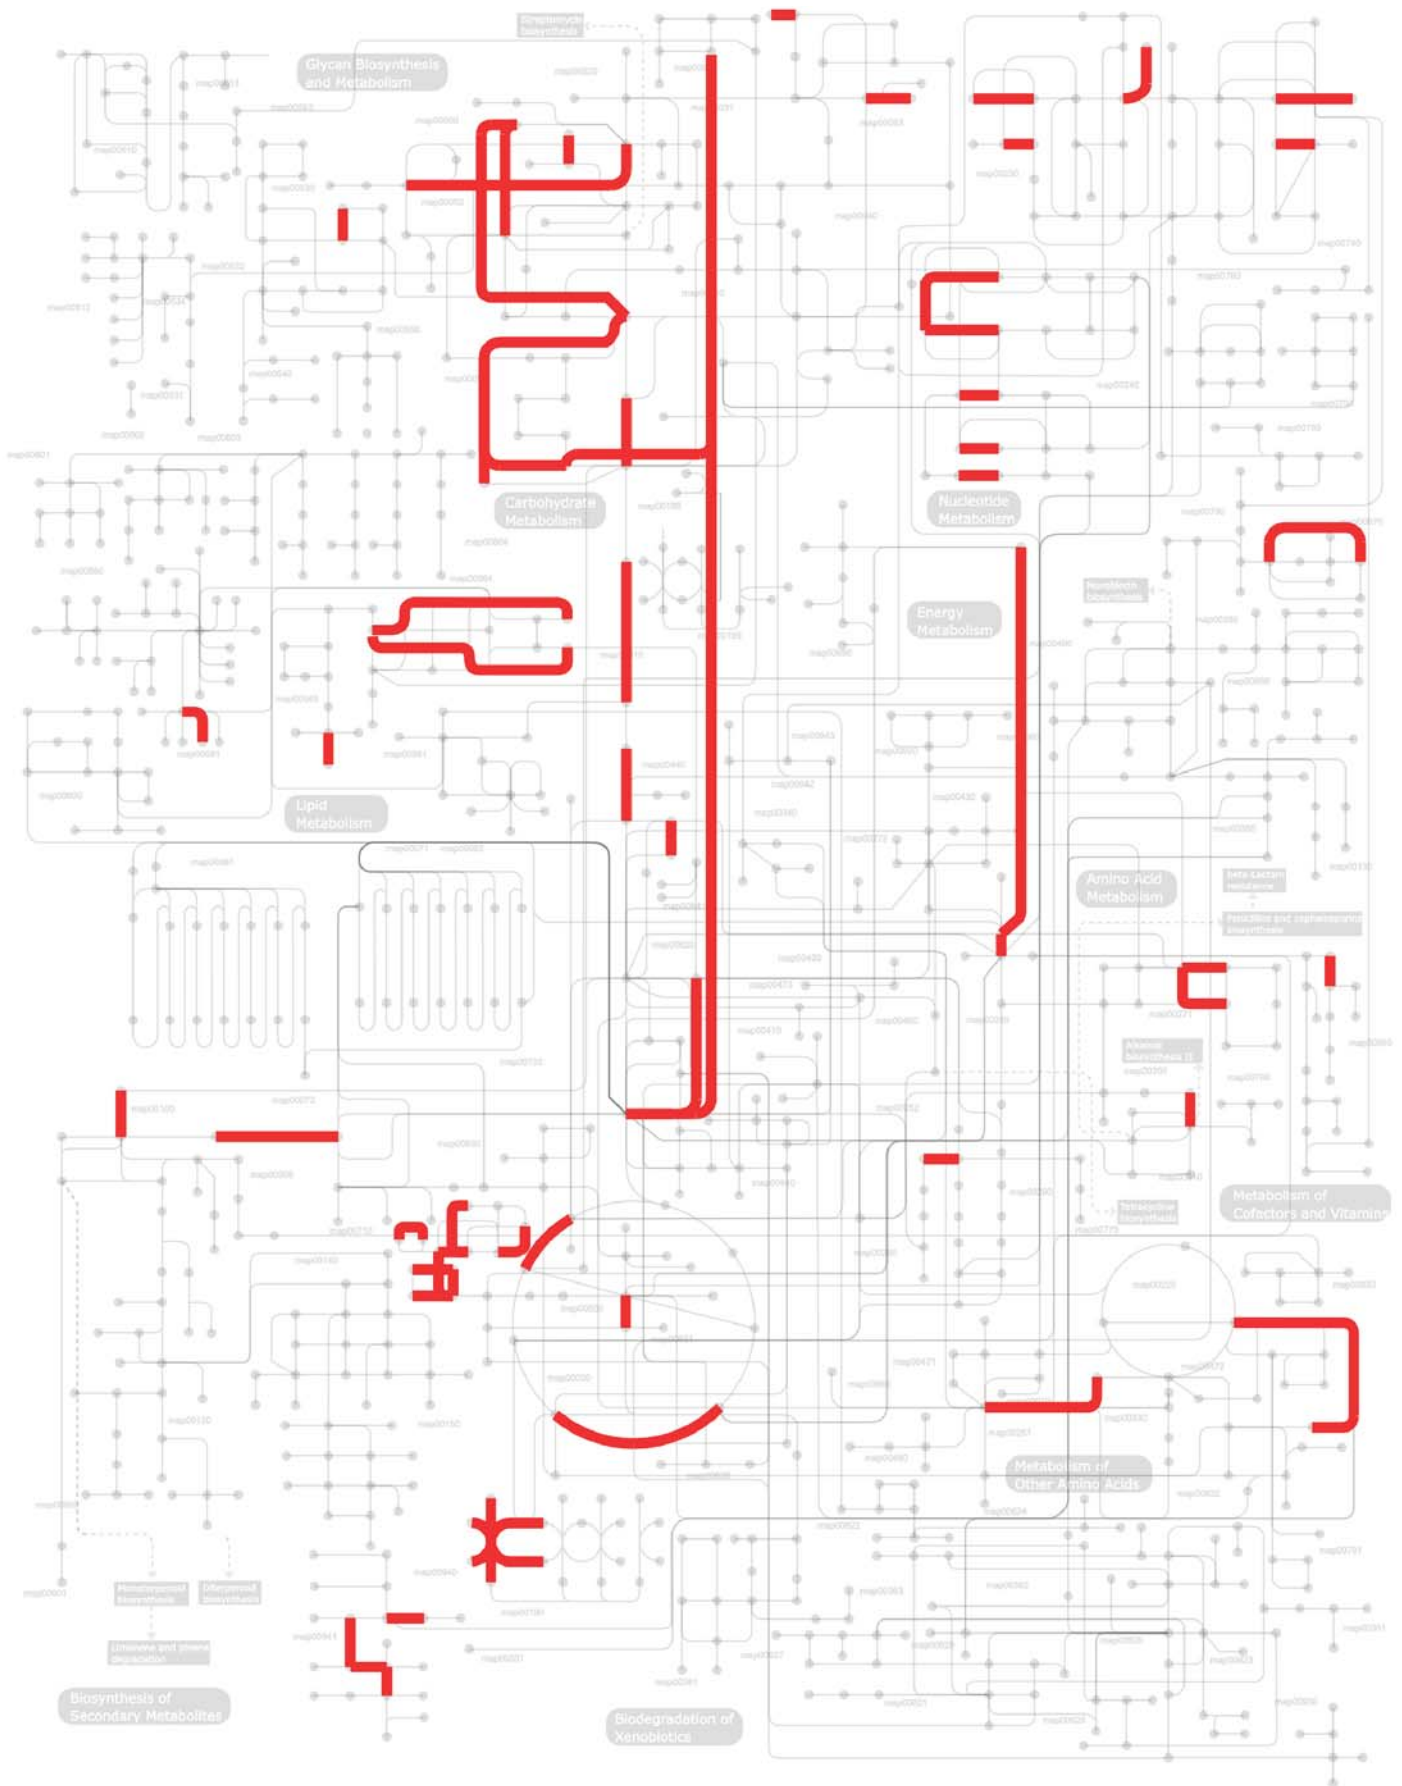

**Figure S16.** Biochemical pathways present in *S. habrochaites* type 1-4 composite and *S. lycopersicum* type 1 glandular trichomes EST libraries when queried by EC number. Pathways highlighted in red represent biochemical pathways whose expression is present but not significantly different in either library.



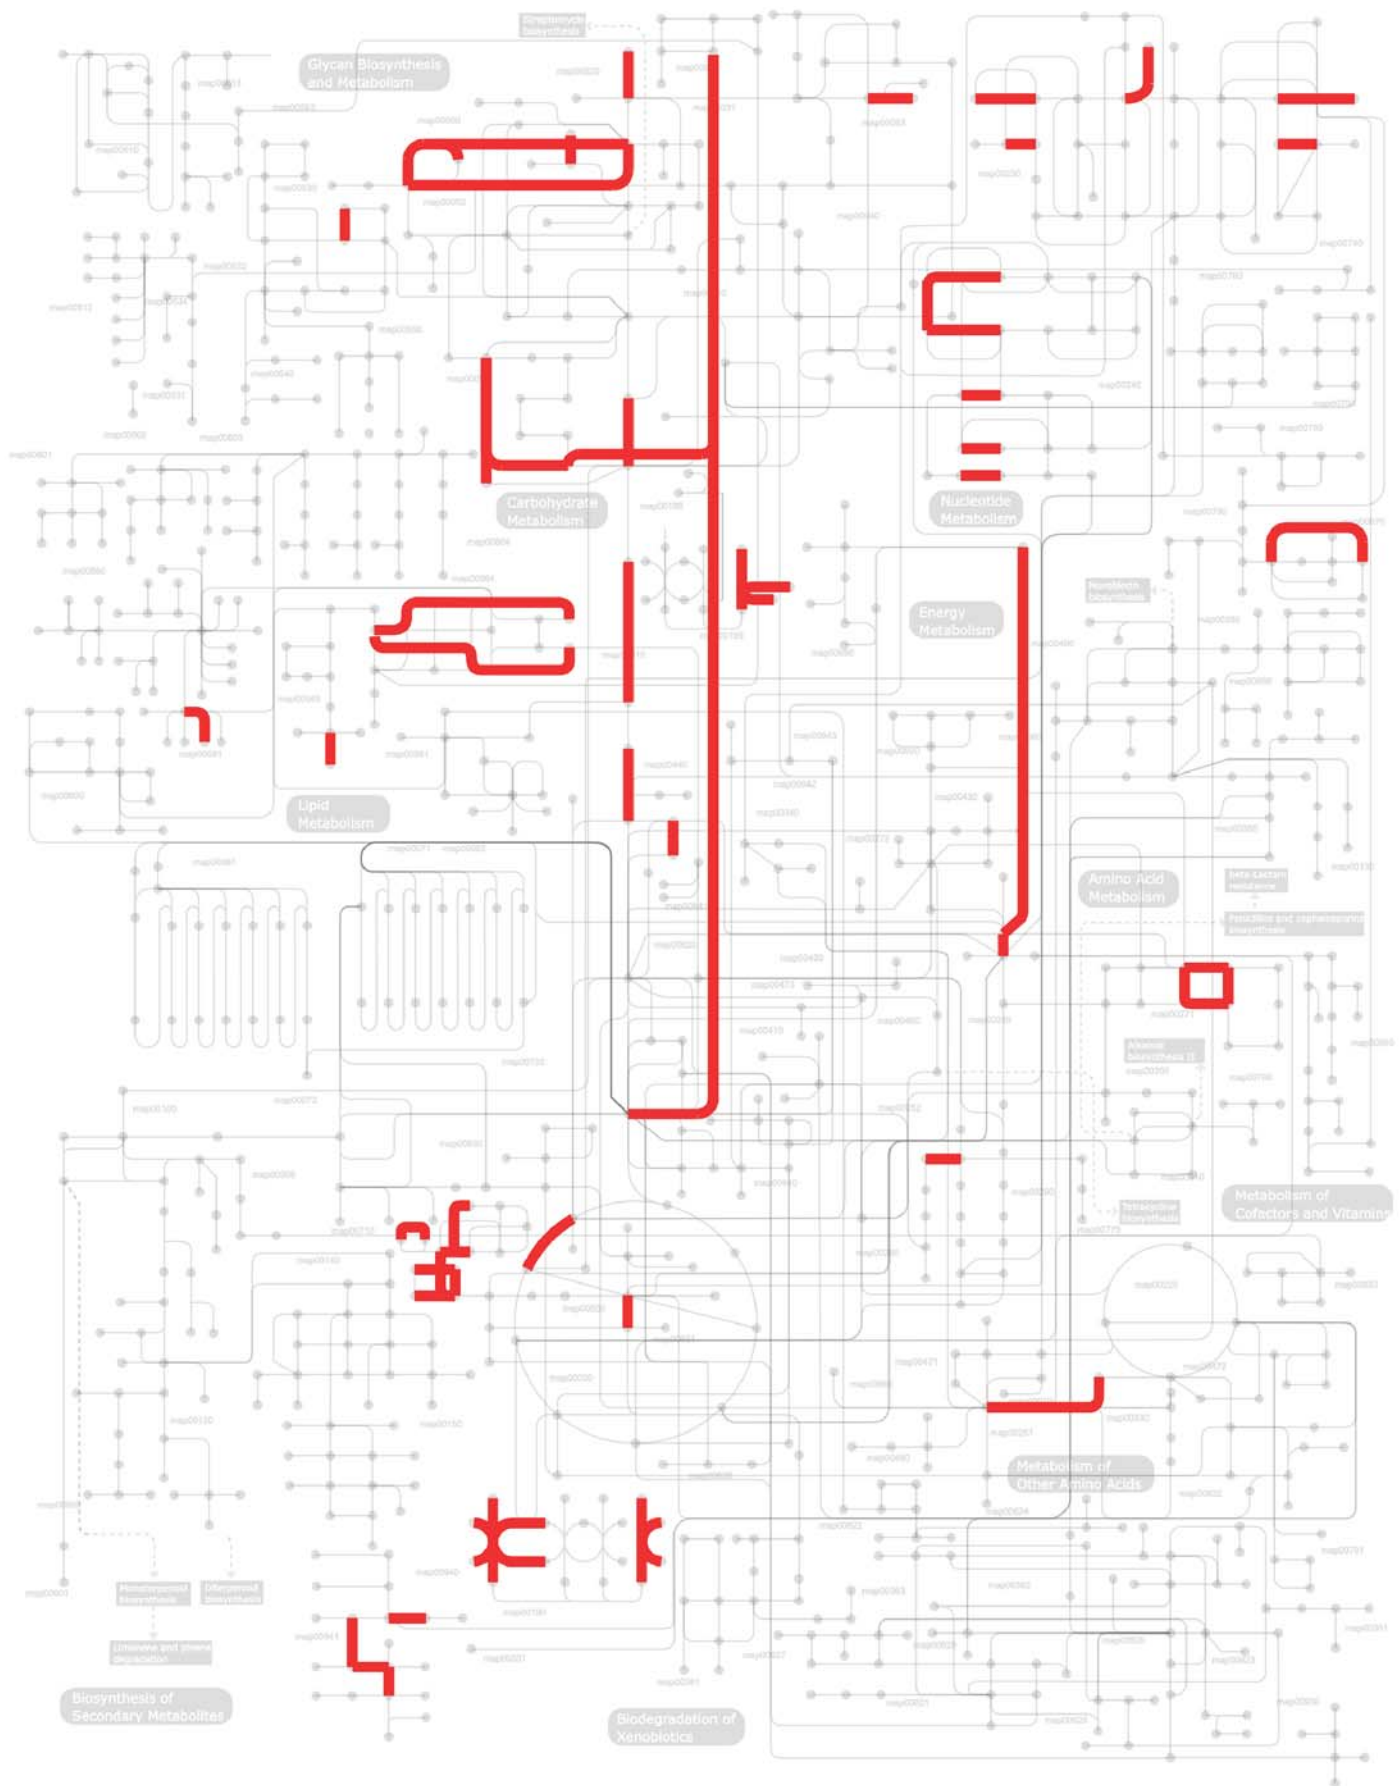

**Figure S17.** Biochemical pathways present in *S. lycopersicum* type 1 and *S. pennellii* type 4 glandular trichomes EST libraries when queried by EC number. Pathways highlighted in red represent biochemical pathways whose expression is present but not significantly different in either library.

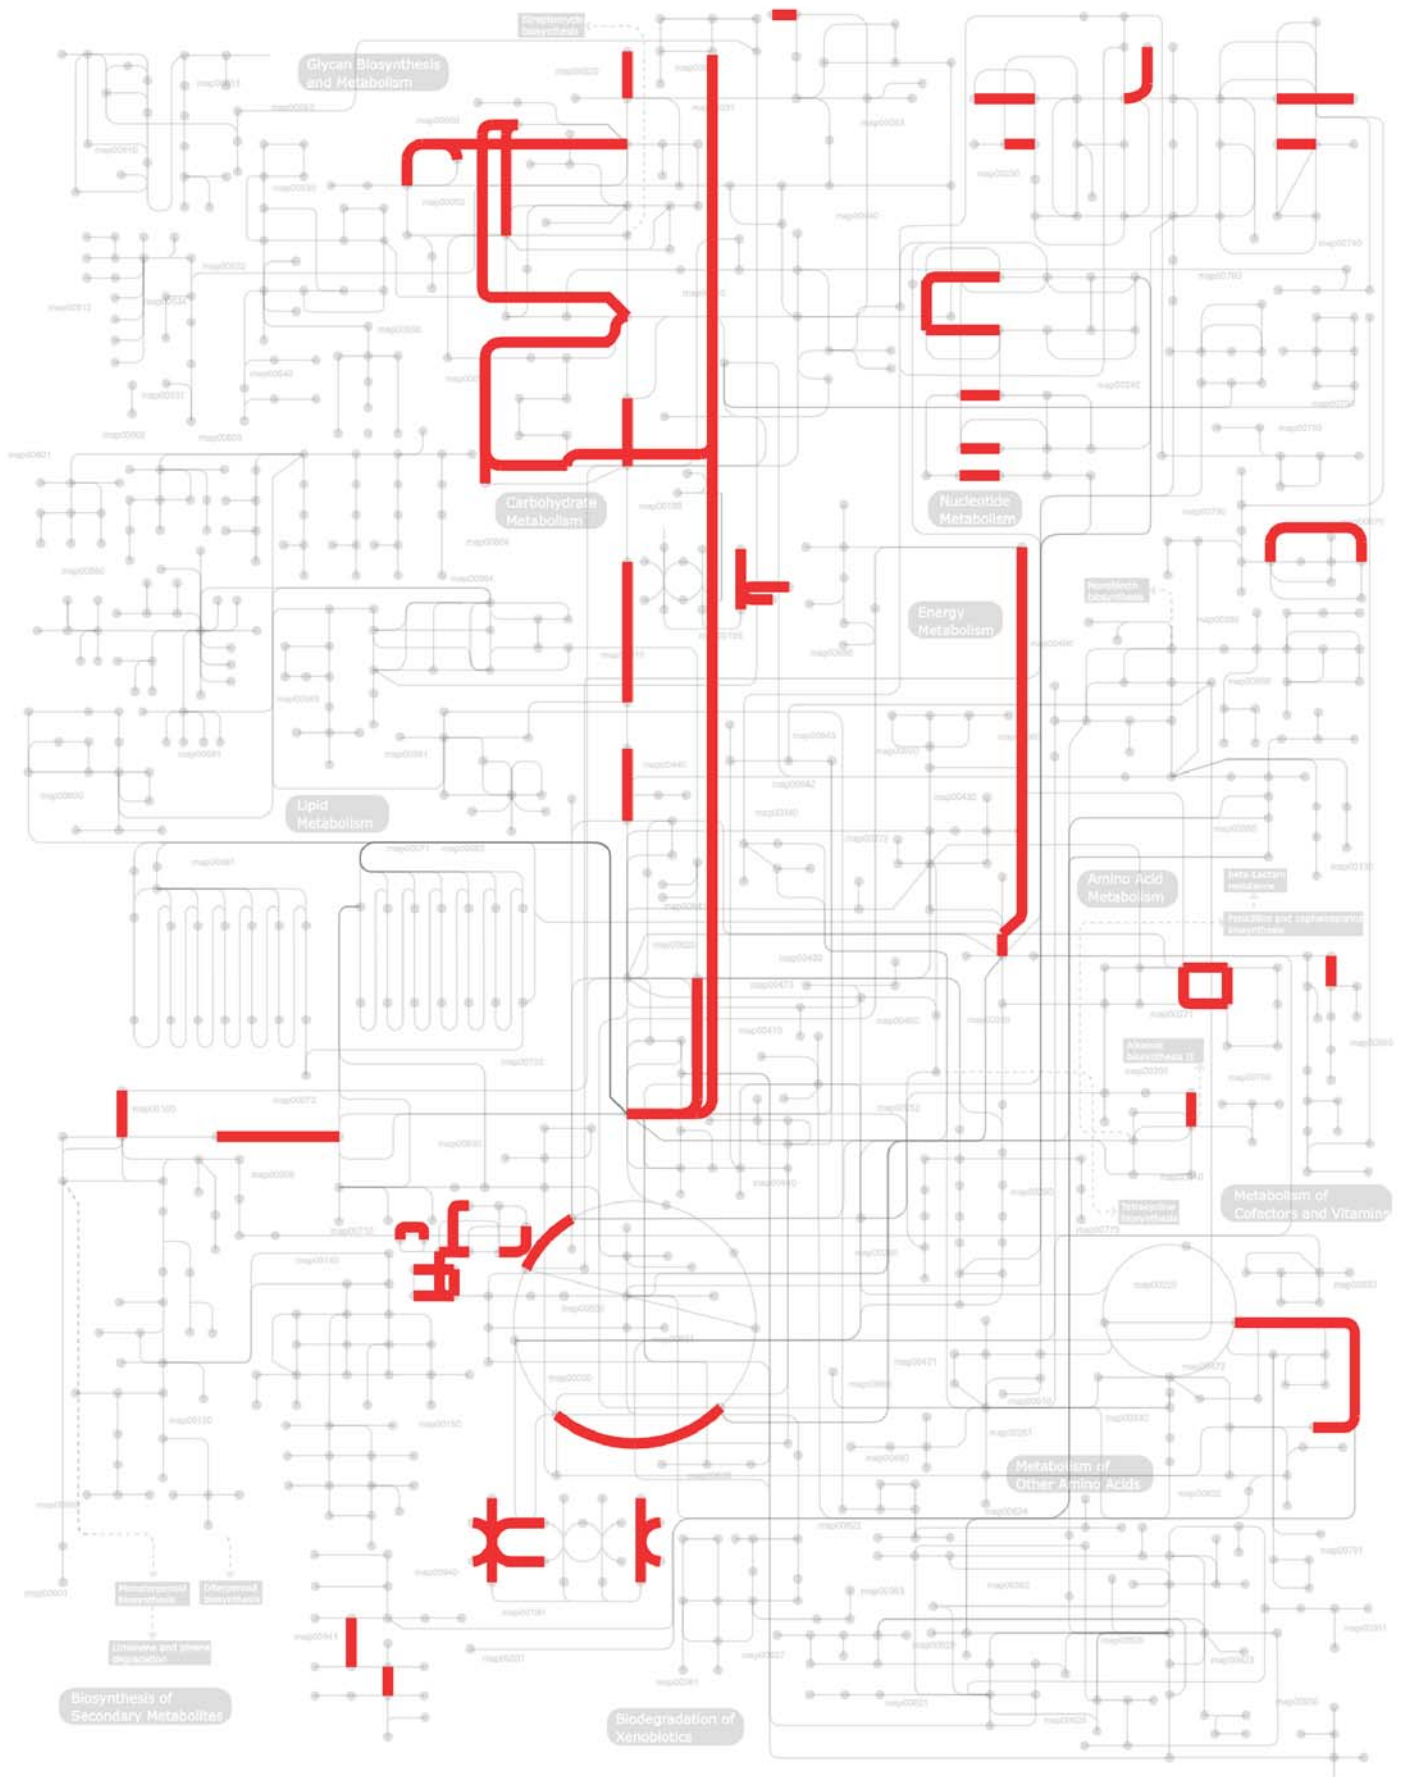

**Figure S18.** Biochemical pathways present in *S. habrochaites* type 1-4 composite and *S. pennellii* type 4 glandular trichomes EST libraries when queried by EC number. Pathways highlighted in red represent biochemical pathways whose expression is present but not significantly different in either library.

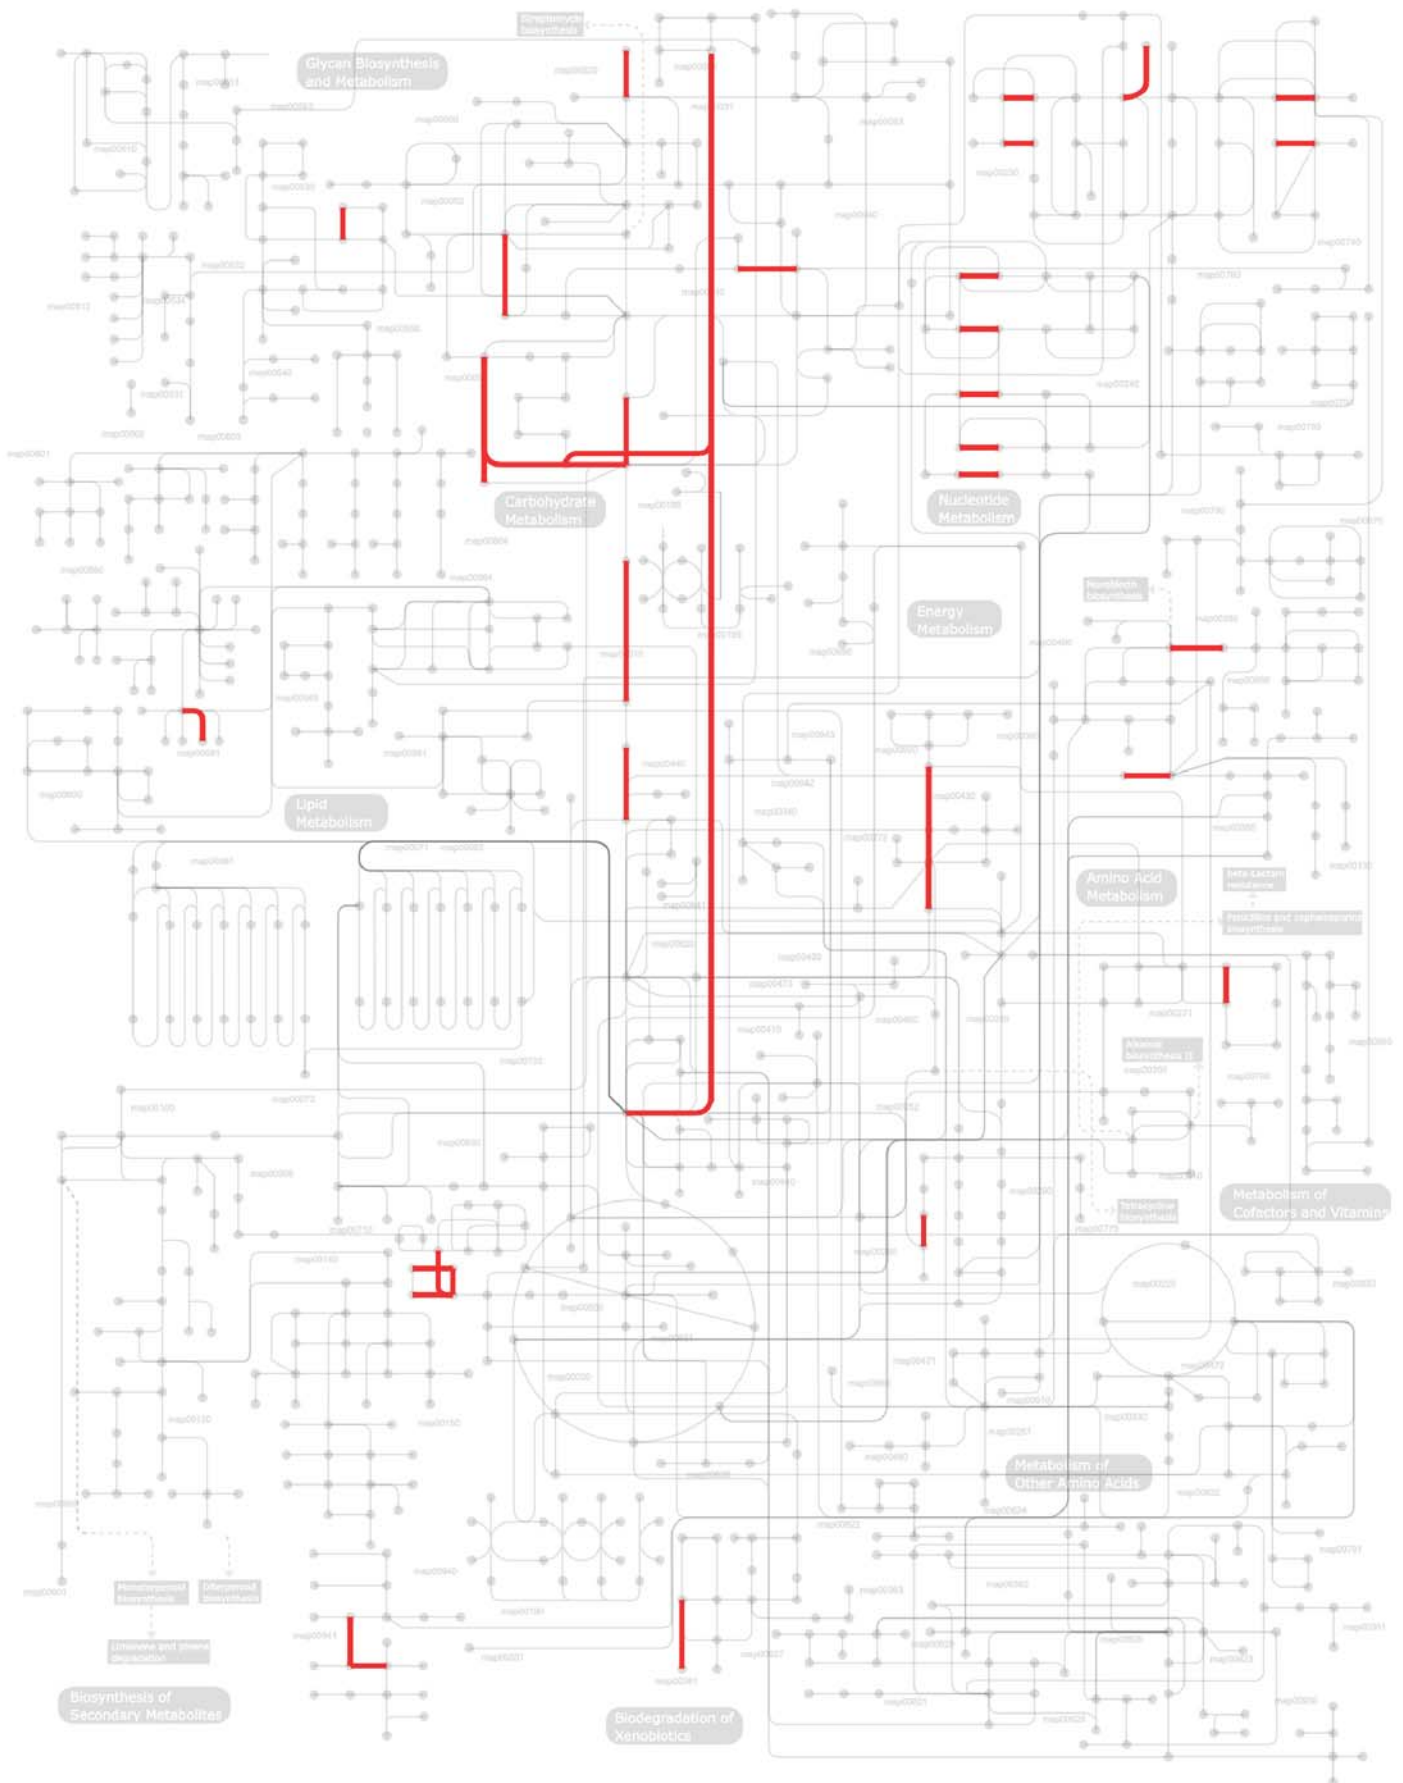

**Figure S19.** Biochemical pathways expressed in *S. lycopersicum* type 7 glandular trichomes when queried by EC number.

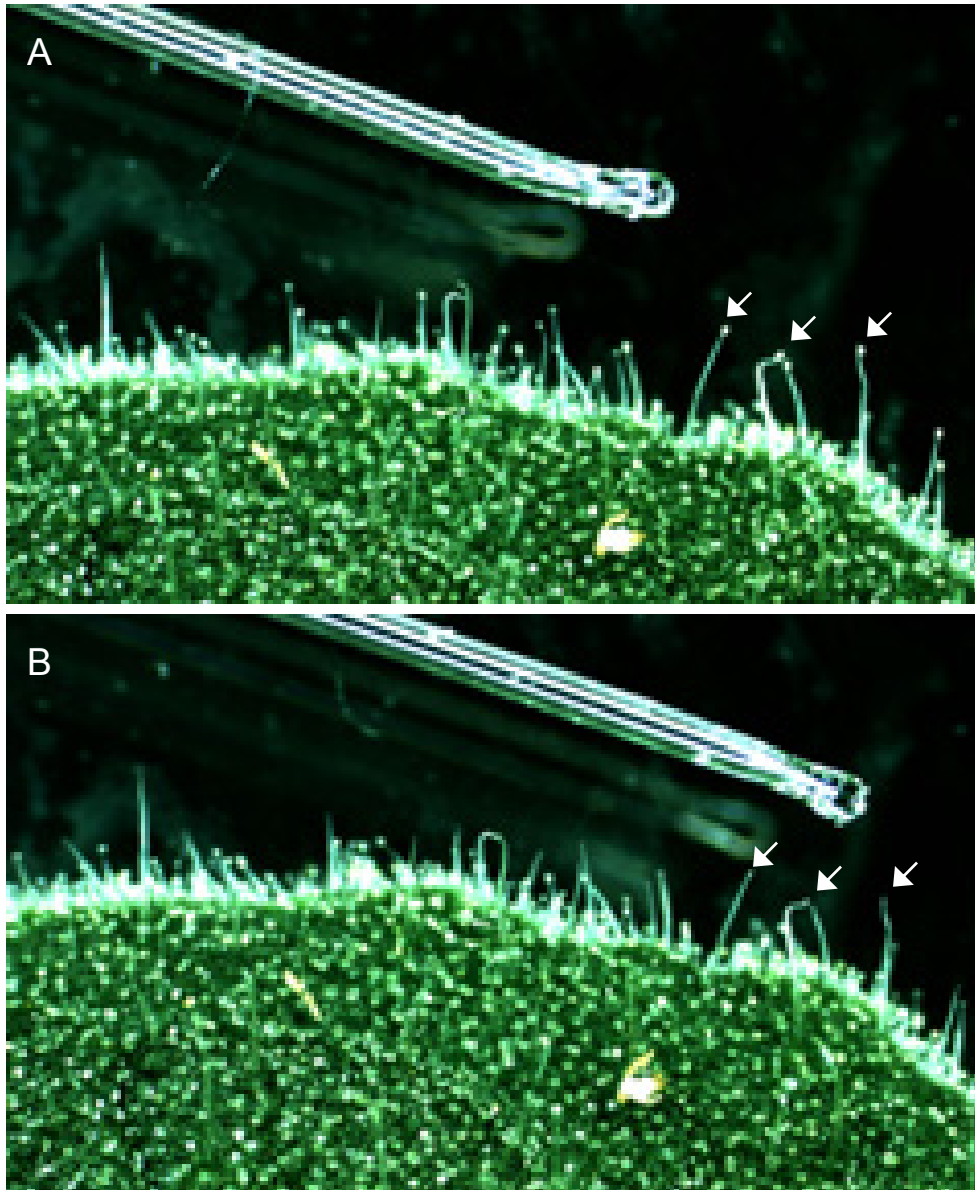

**Figure S20.** *Solanum habrochaites* leaf showing how gland cells are removed from trichomes without disturbing other cell types. Micro-pipettes were used to collect homogenous samples of gland cells from the different types of glandular trichome structures. **A.** Arrows indicate secreting gland cells atop type 1 trichomes. **B.** Gland cells have been removed from trichomes by “picking” with the tip of the micro-pipette shown in the background.
